# Supplementary material
Source: publisher figshare collection journal article supplement (https://acs.figshare.com/ndownloader/files/3612159)
Supplement: Supplementary file 1 [file 3612159]

## Supporting information for

# Symmetry Breaking Charge Transfer of Visible Light Absorbing System

Cong Trinh,<sup>1</sup> Kent Kirlikovali,<sup>1</sup> Saptaparna Das,<sup>1</sup> Maraia E Ener,<sup>2</sup> Harry B Gray,<sup>2</sup> Peter Djurovich,<sup>1</sup> Stephen E Bradforth,<sup>1</sup> Mark E Thompson.<sup>1\*</sup>

<sup>1</sup>Department of Chemistry, University of Southern California, Los Angeles, California 90089

<sup>2</sup>California Institute of Technology, 1200 E California Blvd, Pasadena California 91125

## Table of Content

|                                                                                                                                 |     |
|---------------------------------------------------------------------------------------------------------------------------------|-----|
| 1. Synthesis and Characterization of <b>zDIP1-zDIP4</b> , <b>zDIP2'</b> and <b>zDIP3'</b> .....                                 | S3  |
| 2. Global Analysis of Femtosecond Transient absorption spectra.....                                                             | S6  |
| 3. Femtosecond Excited State Dynamics of <b>zDIP2</b> and <b>zDIP3</b> .....                                                    | S7  |
| 4. Comparison between Spectro-electrochemistry and TA measurements of <b>zDIP1</b> .....                                        | S8  |
| 5. Figure S1. <sup>1</sup> H NMR of <b>zDIP3</b> .....                                                                          | S9  |
| 6. Figure S2. <sup>13</sup> C NMR of <b>zDIP3</b> .....                                                                         | S10 |
| 7. Figure S3. <sup>1</sup> H NMR of <b>zDIP4</b> .....                                                                          | S11 |
| 8. Figure S4. <sup>13</sup> C NMR of <b>zDIP4</b> .....                                                                         | S12 |
| 9. Figure S5. <sup>1</sup> H NMR of <b>zDIP5</b> in CDCl <sub>3</sub> over time.....                                            | S13 |
| 10. Figure S6. <sup>13</sup> C NMR of <b>zDIP5</b> in CDCl <sub>3</sub> .....                                                   | S14 |
| 11. Figure S7. <sup>1</sup> H NMR of <b>zDIP6</b> in CDCl <sub>3</sub> over time.....                                           | S15 |
| 12. Figure S8. <sup>13</sup> C NMR of <b>zDIP6</b> in CDCl <sub>3</sub> .....                                                   | S16 |
| 13. Figure S9. Absorption spectra of <b>zDIP1-4</b> in different solvents .....                                                 | S17 |
| 14. Figure S10. Emission spectra of <b>zDIP1</b> , <b>zDIP3</b> and <b>zDIP4</b> in different solvents .....                    | S18 |
| 15. Figure S11. Emission and absorption intensities of <b>zDIP2</b> solution in dichloromethane at various concentrations. .... | S19 |
| 16. Figure S12. Emission spectra of <b>zDIP1-4</b> in 2MeTHF at 77K.....                                                        | S20 |
| 17. Figure S13. Absorption spectra of <b>zDIP5</b> and <b>zDIP6</b> in different solvents.....                                  | S21 |
| 18. Figure S14. Emission spectra of <b>zDIP6</b> in different solvents .....                                                    | S22 |
| 19. Figure S15. Emission spectra of <b>zDIP1-4</b> in 2MeTHF at 77K.....                                                        | S23 |
| 20. Figure S16. Electrochemistry measurements of <b>zDIP1-4</b> in THF.....                                                     | S24 |
| 21. Figure S17. Electron density surfaces of <b>zDIP1</b> and <b>zDIP2</b> .....                                                | S25 |
| 22. Figure S18. DADS used to fit the transient spectra of <b>zDIP1</b> in various solvents.....                                 | S26 |
| 23. Figure S19. Femtosecond TA of <b>zDIP2</b> in cyclohexane and toluene.....                                                  | S27 |
| 24. Figure S20. DADS used to fit the transient spectra of <b>zDIP2</b> in various solvents.....                                 | S28 |
| 25. Figure S21. Femtosecond TA of <b>zDIP3</b> in cyclohexane, toluene and acetonitrile.....                                    | S29 |

|                                                                                                                                            |        |
|--------------------------------------------------------------------------------------------------------------------------------------------|--------|
| 26. Figure S22. DADS used to fit the transient spectra of <b>zDIP3</b> in various solvents.....                                            | S30    |
| 27. Figure S23. Normalized photoluminescence measurements of <b>zDIP1-3</b> in different polarity solvents.....                            | S31    |
| 28. Figure S24. Electrochemistry and spectroelectrochemistry measurements of <b>zDIP1</b> in dichloromethane.....                          | S32    |
| 29. Figure S25. Spectral lineshape comparison between spectro-electrochemistry and TA measurements of <b>zDIP1</b> in dichloromethane..... | S33    |
| 30. Figure S25. Microsecond TA of <b>zDIP1</b> in cyclohexane and toluene .....                                                            | S34    |
| 31. Figure S26. Ortep diagrams of <b>zDIP2</b> and <b>zDIP5</b> .....                                                                      | S35    |
| 32. Table S1. Photophysical properties of <b>zDIP1-6</b> in different solvents. ....                                                       | S36-37 |
| 33. X-ray data collection and structural determination of <b>zDIP3</b> .....                                                               | S38-40 |
| 34. X-ray data collection and structural determination of <b>zDIP4</b> .....                                                               | S41-43 |
| 35. X-ray data collection and structural determination of <b>zDIP5</b> .....                                                               | S44-46 |
| 36. X-ray data collection and structural determination of <b>zDIP6</b> .....                                                               | S47-49 |
| 37. Fitting parameters for the PL lifetime measurements of <b>zDIP1-3</b> in different solutions..                                         | S50    |

## Synthesis and Characterization:

**Synthesis of homoleptic complexes *zDIP1*–*zDIP4*.** 2,4-dimethylpyrrole (98%) and 3-ethyl-2,4-dimethylpyrrole were purchased from TCI America; 2-methylpyrrole was synthesized by published procedure; synthesis of *zDIP1* followed the literature procedures.<sup>42</sup> The obtained *zDIP1* was further purified by vacuum sublimation. Syntheses of *zDIP2*–*zDIP4* were modified from the literature procedures for *zDIP1*. The synthetic procedure for preparing *zDIP2* is given below; the same procedure was used to prepare *zDIP3* and *zDIP4*.

*Bis(1,9-dimethyl-5-mesityldipyrinato) zinc (zDIP2).* A solution of mesitaldehyde (4.6 g, 30.9 mmol) and 2-methylpyrrole (5 g, 61.7 mmol) in 200 ml dichloromethane was prepared and 3 drops of trifluoroacetic acid (TFA) were added to the rapidly stirred solution under nitrogen. After stirring for 6 hours, the reaction was quenched with 3 ml of triethylamine. The reaction mixture was washed with a saturated solution of Na<sub>2</sub>CO<sub>3</sub> in water (100 ml, 3 times), and brine (100 ml, 1 time), and dried over anhydrous Na<sub>2</sub>SO<sub>4</sub>. The solvent was then removed under reduced pressure to obtain the viscous pale yellow liquid which solidifies upon standing at room temperature; the yield was quantitative. The product 1,9-dimethyl-5-mesityldipyrromethane was used without further purification.

A solution of 1,9-dimethyl-5-mesityldipyrromethane in 250 ml freshly distilled tetrahydrofuran (THF) was prepared, and a solution of 2,3-dichloro-5,6-dicyano-1,4-benzoquinone (DDQ) (7.02 g, 30.9 mmol) in 35 ml of THF was added slowly to the stirred solution under nitrogen. After stirring for 1 hour, the reaction was quenched with 10 ml of triethylamine. The solvent was removed under reduced pressure. The product mixture was dissolved in 500 ml of dichloromethane, and the solution was washed with saturated NaHCO<sub>3</sub> solution (250 ml, 3 times) and brine (250 ml, 1 time). The solution was then dried over anhydrous Na<sub>2</sub>SO<sub>4</sub> and filtered. The product 1,9-dimethyl-5-mesityldipyrromethene was used for the next step without further purification.

A solution of zinc acetate dihydrate (Zn(OAc)<sub>2</sub>•2H<sub>2</sub>O) (20 g, 91 mmol) in 100 ml of methanol was added to the solution of 1,9-dimethyl-5-mesityldipyrromethene in dichloromethane under air. The reaction mixture was stirred overnight. After that, the reaction mixture was filtered using filter paper, and the

solvents were removed under reduced pressure yielding a dark red solid. The obtained solid was passed through a short neutral alumina plug using hexanes/dichloromethane (7/3) mixture as eluent; the orange-red portion was collected. The solvents were removed, and the solid was recrystallized from CH<sub>2</sub>Cl<sub>2</sub>/MeOH, yielding 2.5 g of dark green solid *zDIP2* (12.3 % total yield). The obtained *zDIP2* product was further purified by sublimation under high vacuum (10<sup>-5</sup> torr) using gradient temperature zones of 220 °C/160 °C/120 °C. <sup>1</sup>H NMR (400 MHz, CDCl<sub>3</sub>): δ ppm 6.92 (s, 4H), 6.46-6.43 (m, *J* = 4.25 Hz, 4H), 6.13 (d, *J* = 3.94 Hz, 4H), 2.37 (s, 6H), 2.14 (s, 12H), 2.11 (s, 12H) matches well with published data.<sup>50</sup>

*Bis(1,3,7,9-tetramethyl-5-mesityldipyrrinato) zinc (zDIP3)*. 3.0 g of orange-red solid (13 % total yield). The obtained *zDIP3* was further purified by sublimation under high vacuum (10<sup>-5</sup> torr) using 230 °C/160 °C/120 °C gradient temperature zones. <sup>1</sup>H NMR (500 MHz, CDCl<sub>3</sub>): δ ppm 6.93 (s, 4H), 5.91 (s, 4H), 2.35 (s, 6H), 2.12 (s, 12H), 2.04 (s, 12H), 1.31 (s, 12H). <sup>13</sup>C NMR (125 MHz, CDCl<sub>3</sub>): δ ppm 155.90, 143.63, 143.15, 137.35, 136.22, 135.57, 134.54, 128.73, 119.56, 21.21, 19.26, 16.12, 14.83. HSMS: calcd for C<sub>44</sub>H<sub>51</sub>N<sub>4</sub>Zn (MH<sup>+</sup>): 699.3400, found: 699.3407. C, H, N elemental analysis for C<sub>44</sub>H<sub>51</sub>N<sub>4</sub>Zn: calcd (%) C (75.47), H (7.20), N (8.00); found (%) C (75.84), H (7.27), N (8.06).

*Bis(2,8-diethyl-1,3,7,9-tetramethyl-5-mesityldipyrrinato) zinc (zDIP4)*. 0.8 g of orange-red solid (8 % total yield). The obtained *zDIP4* was further purified by sublimation under high vacuum (10<sup>-5</sup> torr) using 250 °C/160 °C/120 °C gradient temperature zones. <sup>1</sup>H NMR (500 MHz, CDCl<sub>3</sub>): δ ppm 6.92 (s, 4H), 2.36 (s, 6H), 2.25 (q, *J* = 7.40 Hz, 8H), 2.11 (s, 12H), 1.97 (s, 12H), 1.19 (s, 12H), 0.91 (t, *J* = 7.49 Hz, 12H). <sup>13</sup>C NMR (500 MHz, CDCl<sub>3</sub>): δ ppm 154.68, 142.03, 137.19, 137.10, 137.03, 136.00, 134.17, 130.66, 128.55, 21.24, 19.47, 17.92, 15.25, 14.35, 11.75. HSMS: calcd for C<sub>52</sub>H<sub>67</sub>N<sub>4</sub>Zn (MH<sup>+</sup>) 811.4652, found 811.4658. CNH analysis for C<sub>52</sub>H<sub>66</sub>N<sub>4</sub>Zn: calcd (%) C (76.87), H (8.19), N (6.90); found C (76.98), H (8.35), N (6.97).

**Synthesis of heteroleptic complexes *zDIP2'* and *zDIP3'*.** Representative procedure for *zDIP2'* is the following.

*Zinc(1,9-dimethyl-5-mesityldipyrinato)(2,2,6,6-tetramethyl-3,5-heptanedionato)* (*zDIP2'*).

Concentrated HCl (4 drops) was added to a solution of *zDIP2* (96 mg, 0.149 mmol) in 15 ml dichloromethane. The reaction mixture was rigorously shaken for 30 seconds, then washed with brine (2 times), and Na<sub>2</sub>CO<sub>3</sub> solution (2 times). The obtained solution of ligand in dichloromethane was dried over anhydrous Na<sub>2</sub>CO<sub>3</sub> and filtered. The dried dipyrin ligand was used without further purification.

A solution of bis-(2,2,6,6-tetramethyl-3,5-heptanedionato)zinc, Zn(dpm)<sub>2</sub> (150 mg, 0.347 mmol) in a mixture of dichloromethane/methanol (40/40 ml) was prepared, and slowly added to a solution of the dipyrin ligand in 15 ml dichloromethane over the course of 5 minutes while stirring. The reaction mixture became brightly emissive upon addition of Zn(dpm)<sub>2</sub>. To prevent disproportionation of *zDIP2'*, the solvents were immediately removed under reduced pressure after addition of Zn(dpm)<sub>2</sub>, yielding an orange red solid. The obtained orange solid was dissolved in 10 ml dichloromethane, and 15 ml of methanol was layered on top. This solution was stored for 2 days at -5 °C. Two distinct types of red crystals were subsequently formed; large orange red crystals (heteroleptic complex) and small cubic dark red crystals (homoleptic complex). The large orange red crystals were manually separated under a microscope, yielding 18 mg (9.6%) of heteroleptic complex *zDIP2'*. The obtained crystals were suitable for crystal structure determination by X-ray diffraction. Unlike the homoleptic complex *zDIP2*, the heteroleptic product *zDIP2'* is highly emissive in dichloromethane under UV-lamp illumination. <sup>1</sup>H NMR (400 MHz, CDCl<sub>3</sub>, ppm): 6.89 (s, 2H), 6.42–6.35 (m, 2H), 6.15–6.10 (m, 2H), 5.83–5.80 (m, 1H), 2.35 (s, 3H), 2.23 (s, 6H), 2.14 (s, 6H), 1.19 (s, 18H). <sup>13</sup>C NMR (400 MHz, CDCl<sub>3</sub>, ppm): 203.52, 158.63, 143.85, 138.78, 136.86, 136.81, 135.34, 131.87, 127.41, 116.86, 89.60, 41.73, 28.40, 21.09, 20.06, 16.79. HSMS: calcd for C<sub>31</sub>H<sub>41</sub>N<sub>2</sub>O<sub>2</sub>Zn (MH<sup>+</sup>): 537.2454, found: 527.2463.

*Zinc(1,3,7,9-tetramethyl-5-mesityldipyrinato)(2,2,6,6-tetramethyl-3,5-heptanedionato)* (*zDIP3'*).

*zDIP3'* was synthesized using a procedure similar to that used to prepare *zDIP2'*. An orange solid mixture of heteroleptic and homoleptic complexes was obtained. Unlike the weakly emissive solid of other zinc dipyrins, this orange solid mixture has very bright yellow emission under UV-illumination. The

heteroleptic complex was separated from the homoleptic one by sublimation under high vacuum ( $10^{-5}$  torr) using 170 °C/120 °C/50 °C gradient temperature zones (note that *zDIP3* sublimes at the higher temperature of 230 °C, see above), yielding of *zDIP3'* (50% yield). A suitable crystal from the sublimed solid was used for crystal structure determination.  $^1\text{H}$  NMR (400 MHz,  $\text{CDCl}_3$ , ppm): 6.91 (s, 2H), 5.92 (s, 2H), 5.79 (s, 1H), 2.33 (s, 3H), 2.13 (s, 12H), 1.28 (s, 6H), 1.18 (s, 18H).  $^{13}\text{C}$  NMR (400 MHz,  $\text{CDCl}_3$ , ppm): 203.25, 155.90, 144.19, 144.06, 137.46, 135.83, 135.71, 134.87, 128.75, 119.62, 89.46, 41.65, 28.38, 21.19, 19.68, 16.48, 14.81. HSMS: calcd for  $\text{C}_{33}\text{H}_{45}\text{N}_2\text{O}_2\text{Zn}$  ( $\text{MH}^+$ ): 565.2767, found: 565.2764.

### Global Analysis of femtosecond Transient Absorption Spectra:

The transient absorption spectra of *zDIP1-3* indicate that compared to *zDIP1*, the population from initially formed  $\text{S}_1$  state evolves faster to CT state for both *zDIP2* and *zDIP3*. In addition, the rate for formation of CT state and its subsequent relaxation were found to be dependent on the polarity of the surrounding medium. To quantify the rate of decay of these states in different polarity solvents, TA spectra were fit with a linear decomposition model described elsewhere in detail.<sup>1</sup> In brief, the signal can be described by:

$$S(\lambda, t) = \sum_n C_n(t) \sigma_n(\lambda) \quad (\text{S1})$$

where the time dependent TA signal,  $S(\lambda, t)$ , can be decomposed into a set of time independent species associated difference spectra (SADS),  $\sigma_n(\lambda)$ , and time dependent amplitudes,  $c_n(t)$ . Each SADS corresponds to the characteristic TA spectrum of an excited configuration of the system and consist of both positive features due to excited state absorption and negative features due to stimulated emission and ground state bleach.  $c_n(t)$  is calculated assuming that the evolution of the initially excited population is governed by a series of sequential first order rate processes.

The kinetic model described in the main paper (Figure 9) was used to fit all the femtosecond transient absorption spectra. Based on the polarity of the solvents used, they were categorized as

1) nonpolar (cyclohexane), 2) weakly polar (toluene) and 3) polar (dichloromethane and acetonitrile). Depending on the solvent category different transfer matrices,  $K_{ij}$  are used for the kinetic model:

$$\text{Category 1) } K_{ij} = [k_{11}], \quad \text{Category 2) } K_{ij} = \begin{bmatrix} k_{11} & k_{21} \\ k_{12} & k_{22} \end{bmatrix}, \quad \text{Category 3) } K_{ij} = \begin{bmatrix} 0 & 0 \\ k_{12} & k_{22} \end{bmatrix}$$

Here  $k_{11}$  and  $k_{22}$  represent the first order rates for the decay of the  $S_1$  excited state and the CT state, respectively. And  $k_{12}$  and  $k_{21}$  represent the first order transfer rates from  $S_1$  excited state to the CT state and from the CT state to the  $S_1$  excited state. The solvent polarity dependent data for *zDIP1* (shown in Figure 8) was fitted with this model and the SADS required to model each of the data are shown in Figure S18 (a,c,e,g). These SADS are the characteristic transient spectral signature for the initially populated  $S_1$  excited state ( $\sigma_1$ ) and subsequently formed CT state ( $\sigma_2$ ). The corresponding fits to the time slices of the ground state bleach and CT state induced absorption are also shown in Figure S18 (b,d,f,h).

### **Excited State Dynamics of *zDIP2* and *zDIP3*:**

Figure S19 and S21 shows the solvent polarity dependent TA spectra for *zDIP2* and *zDIP3*, respectively. In cyclohexane, both *zDIP2* (Fig. S19a) and *zDIP3* (Fig. S21a) show similar dynamics to that observed for *zDIP1* in the main paper, however the relaxation of the  $S_1$  excited state to the ground state for *zDIP3* is faster ( $\sim 1.4$  ns) compared to *zDIP1* (4.5 ns) and *zDIP2* (4.8 ns). This dramatic decrease in  $S_1$  excited state lifetime for *zDIP3* is also consistent with the TCSPC results (shown in Fig. S23) and it is due to presence of higher non-radiative processes discussed in the main paper (Figure 5).

However in toluene, for both *zDIP2* (Fig. S19b) and *zDIP3* (Fig. S21b) over the time some population from initially formed  $S_1$  state evolve to CT state (indicated by the induced absorption

growing at  $\sim 370$  nm) and some relax back to the ground state (stimulated emission at  $\sim 525$  nm remains till 1 ns). And so an equilibrium exists between the CT state and  $S_1$  state similar to that observed in  $zDIP1$  in the main paper. The forward and backward rate constants ( $1/k_{CT}$  and  $1/k_{CR}$ ) between the  $S_1$  and the CT states obtained from the global analysis are 8.6 and 15.5 ps; 2.3 and 11.2 ps respectively for  $zDIP2$  and  $zDIP3$ . Once formed, the CT state decays with a rate constant ( $1/k_{rec}$ ) of 4.0 ns and 2.5 ns for  $zDIP2$  and  $zDIP3$ , respectively. Unlike toluene, in polar solvents such as acetonitrile  $zDIP3$  (Fig. S21c) evolves to CT state at a faster rate ( $1/k_{CT} = 1$  ps) due to the stabilization of the CT states by the large solvation energy of the acetonitrile. The SADS and the fits for the time traces obtained from the modeling of the TA spectra using global analysis for  $zDIP2$  and  $zDIP3$  are shown in Figure S20 and S22, respectively.

#### **Comparison between Spectro-electrochemistry and TA measurements of $zDIP1$ :**

The spectral assignment of  $zDIP1$  anion is obtained from spectro-electrochemical reduction experiments in dichloromethane (Figure 7, main paper). This assignment is used to assign the induced absorption band at 517 nm from TA measurements (Figure 8, main paper). In Fig. S25 the two absorption profiles are overlaid to make a direct comparison between the two experiments. Although the peak at 517 nm matches perfectly, the bleach shape looks different between the two experiments. This is mainly due to the presence of an additional peak between 370-470 nm (encircled in green) in the spectro-electrochemical reduction experiments. The absence of this peak in TA data is probably because the molecule forms both a  $zDIP1$  radical cation and radical anion in its excited state (as probed in TA experiment) whereas in the reduction experiments there is only  $zDIP1$  radical anion present. We suspect that the total absorptions for the radical anion is obscured by the presence of radical cation, and the anion signal may be overwhelmed by the bleach signal which is doubled due to removal of two chromophores (one



forming the anion and the other forming the cation). Another possible reason could be a two electron reduction, *i.e.* reduction of both dipyrin ligands, in spectro-electrochemical experiments.

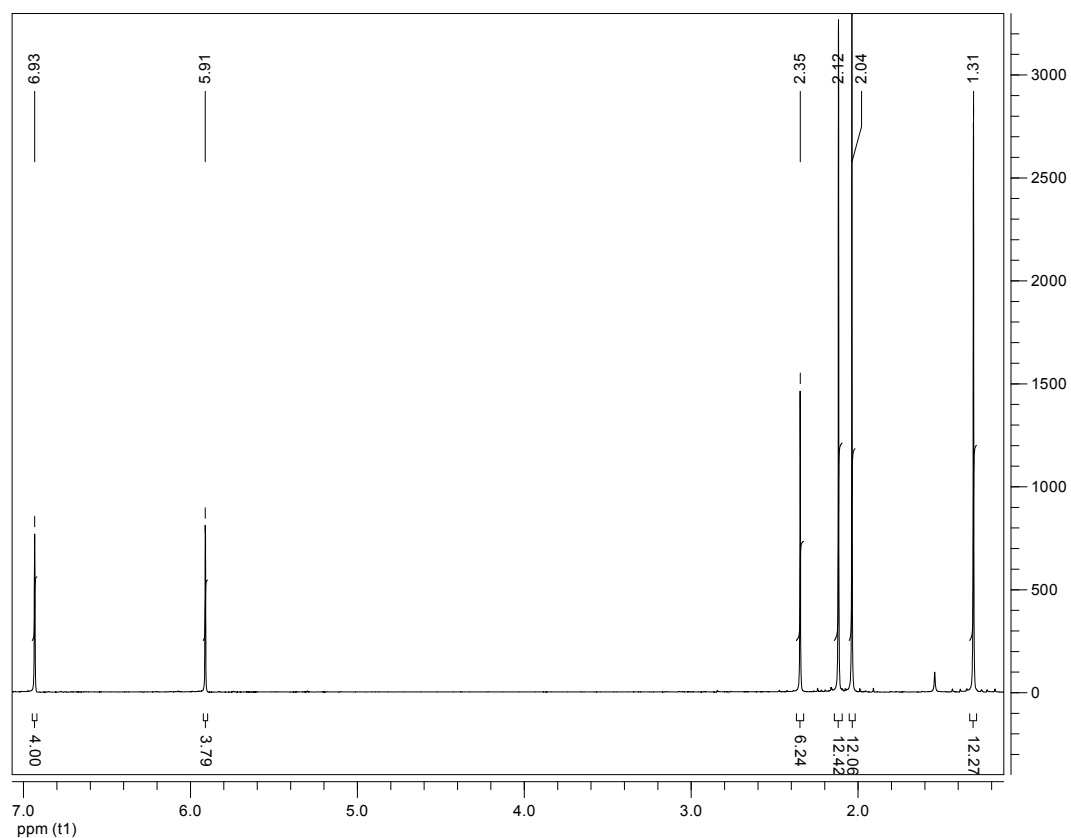

**Figure S1.**  $^1\text{H}$  NMR of *zDIP3*.

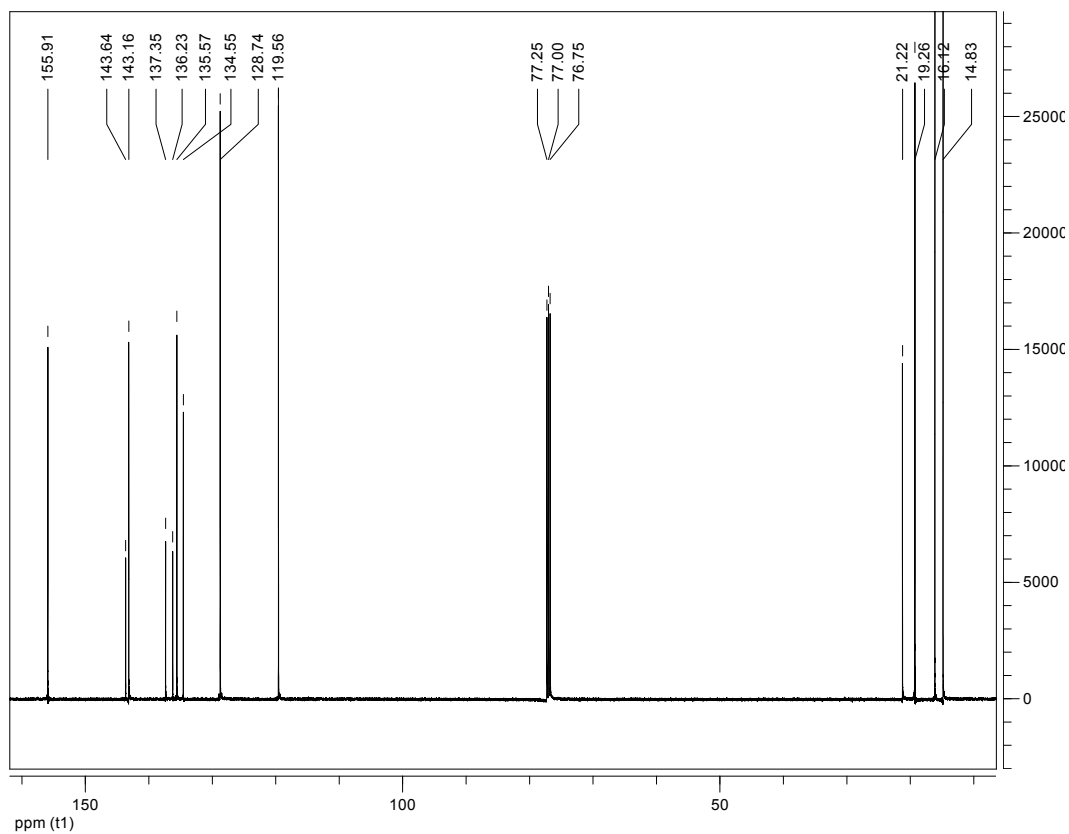

**Figure S2.**  $^{13}\text{C}$  NMR of *zDIP3*.

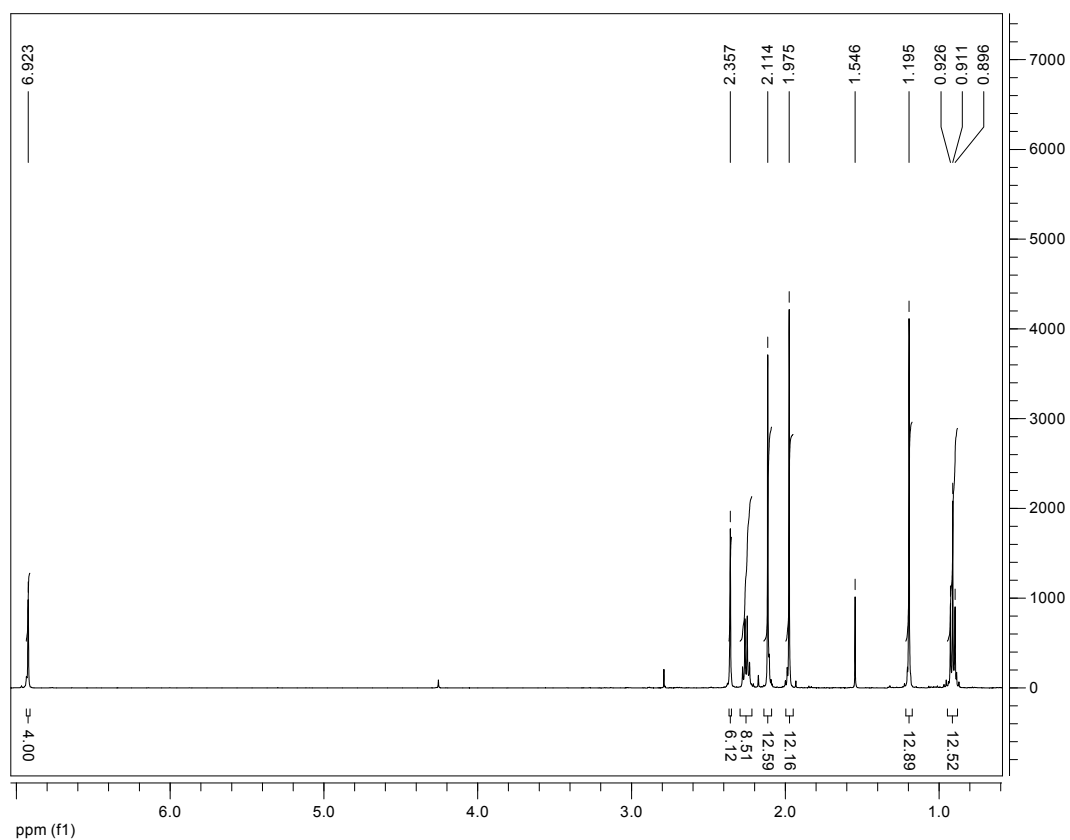

**Figure S3.** <sup>1</sup>H NMR of *zDIP4*.

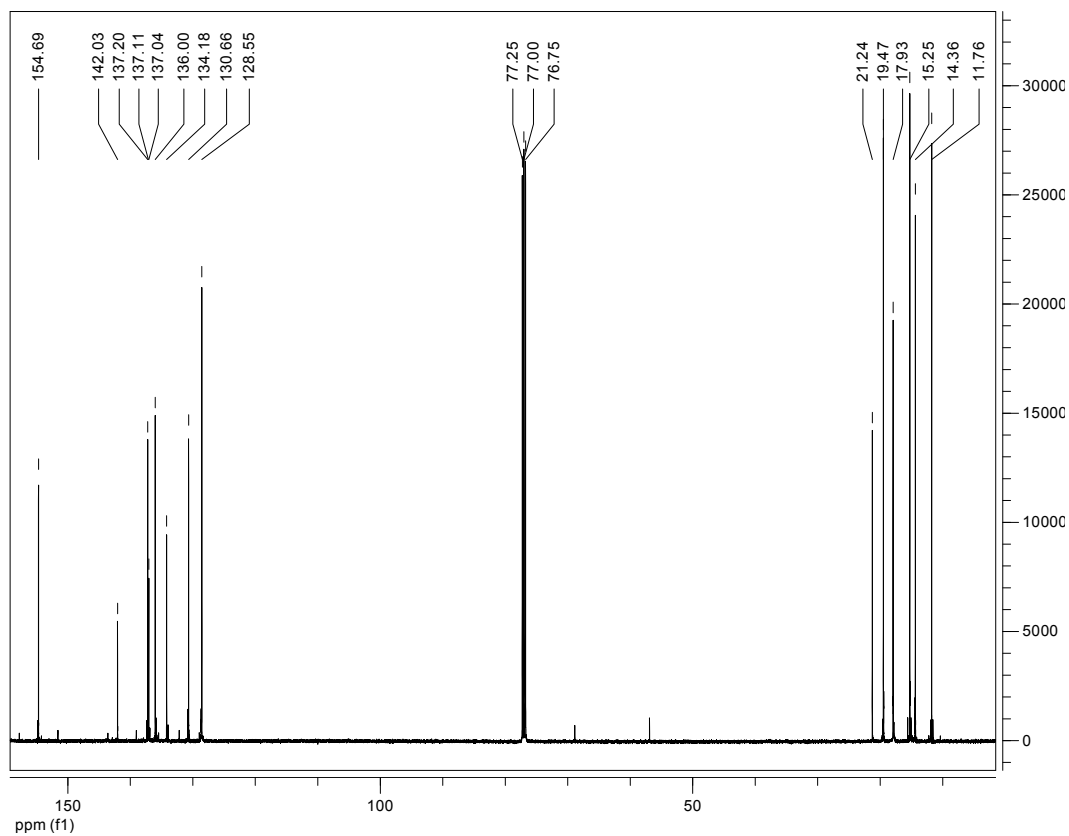

**Figure S4.**  $^{13}\text{C}$  NMR of *zDIP4*

a)

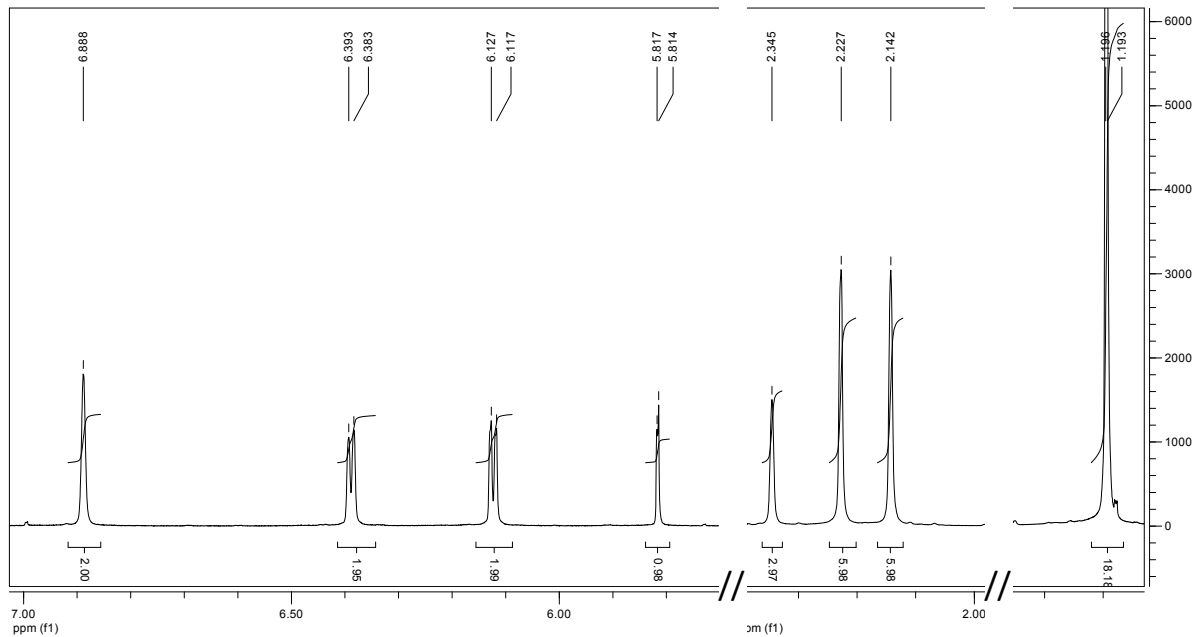

b)

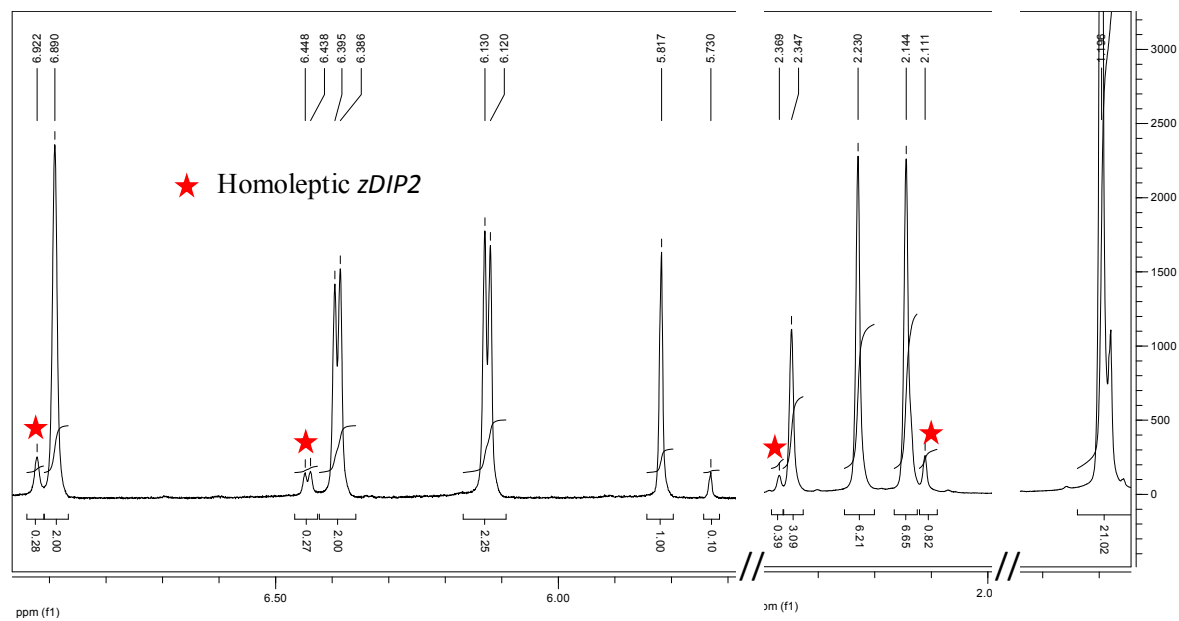

**Figure S5.**  $^1\text{H}$  NMR of  $z\text{DIP5}$  in  $\text{CDCl}_3$  over time. (a) freshly prepared solution of  $z\text{DIP5}$  and (b) solution in NRM tube after 4 hours, estimated molar ratio of heteroleptic:homoleptic complexes ( $z\text{DIP5}$ :  $z\text{DIP2}$  = 15:1)

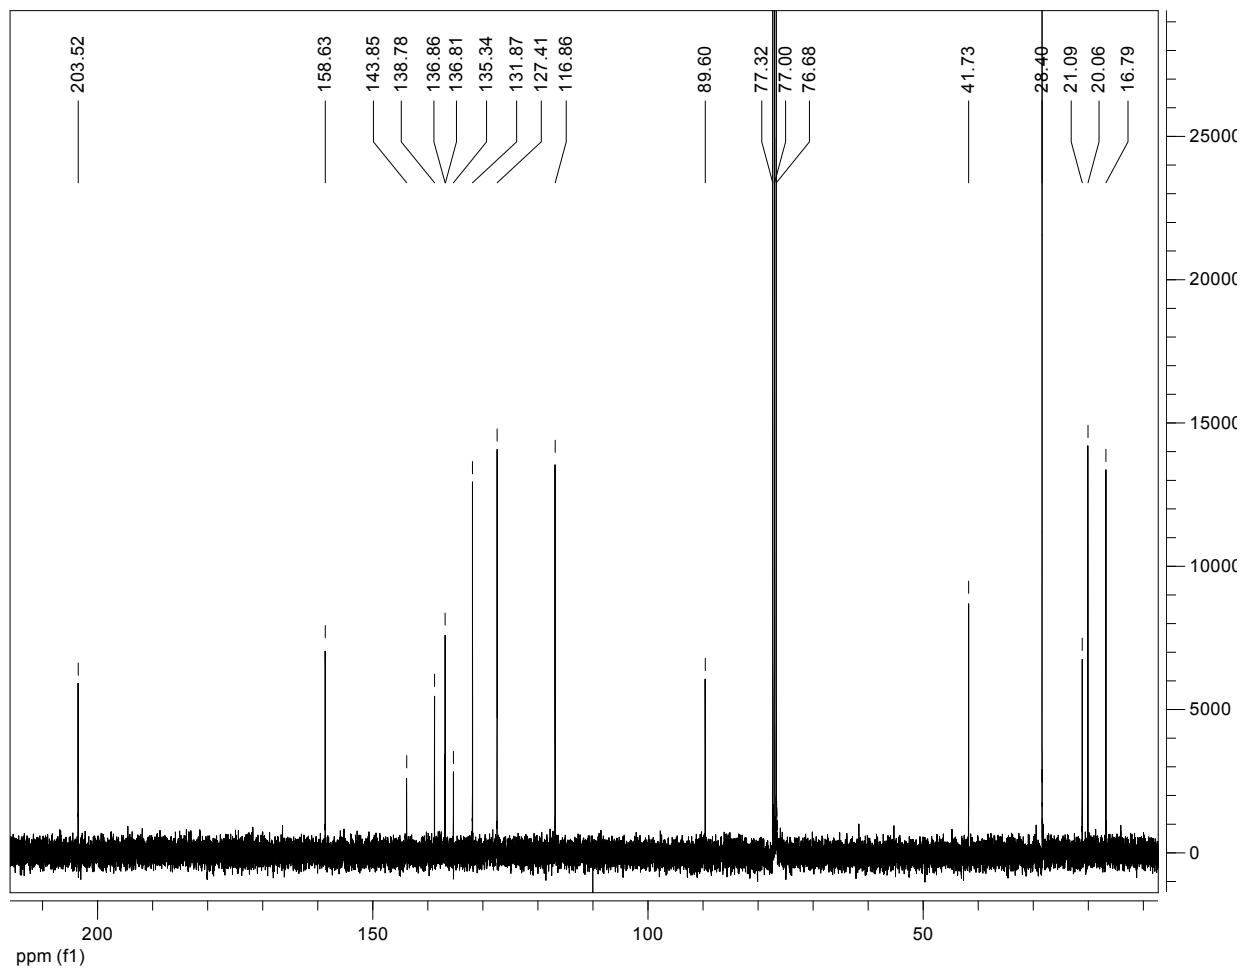

**Figure S6.** <sup>13</sup>C NMR of *zDIP5* in CDCl<sub>3</sub>.

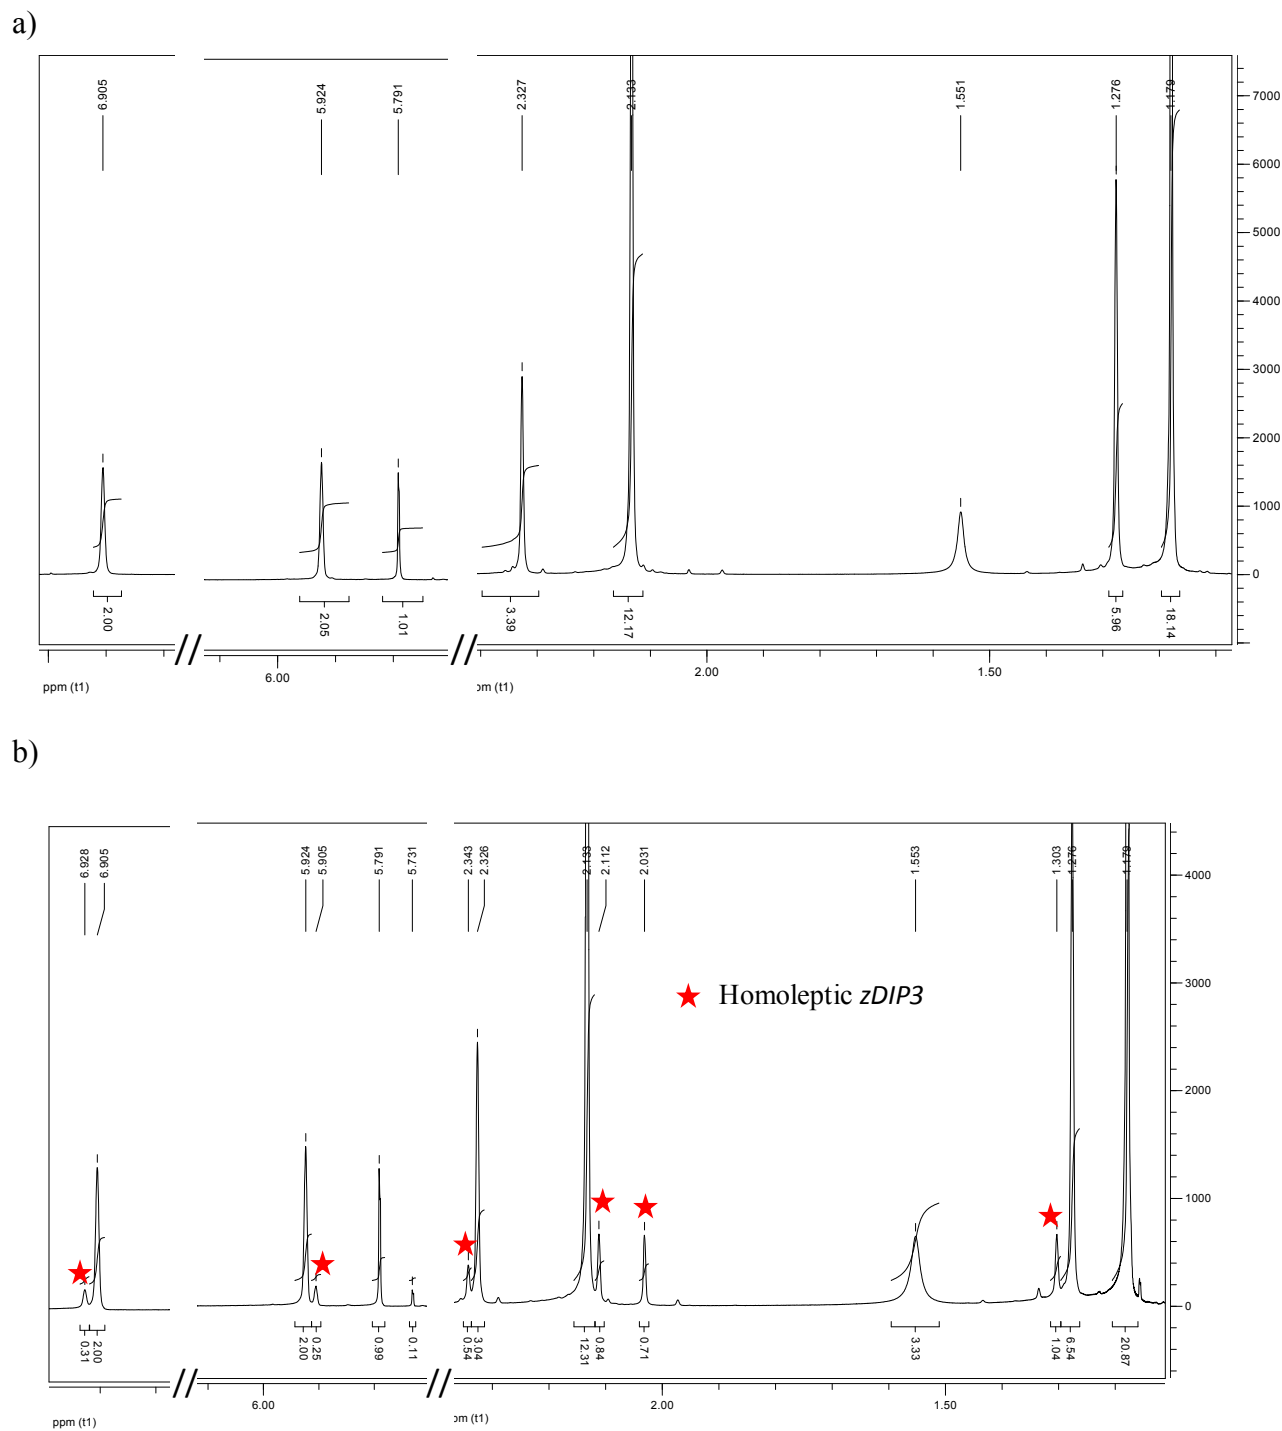

**Figure S7.**  $^1\text{H}$  NMR of  $z\text{DIP6}$  in  $\text{CDCl}_3$  over time. (a) freshly prepared solution of  $z\text{DIP6}$  and (b) solution in NRM tube after 8 hours, estimated molar ratio of heteroleptic:homoleptic complexes ( $z\text{DIP6}$ :  $z\text{DIP3}$  = 13:1)



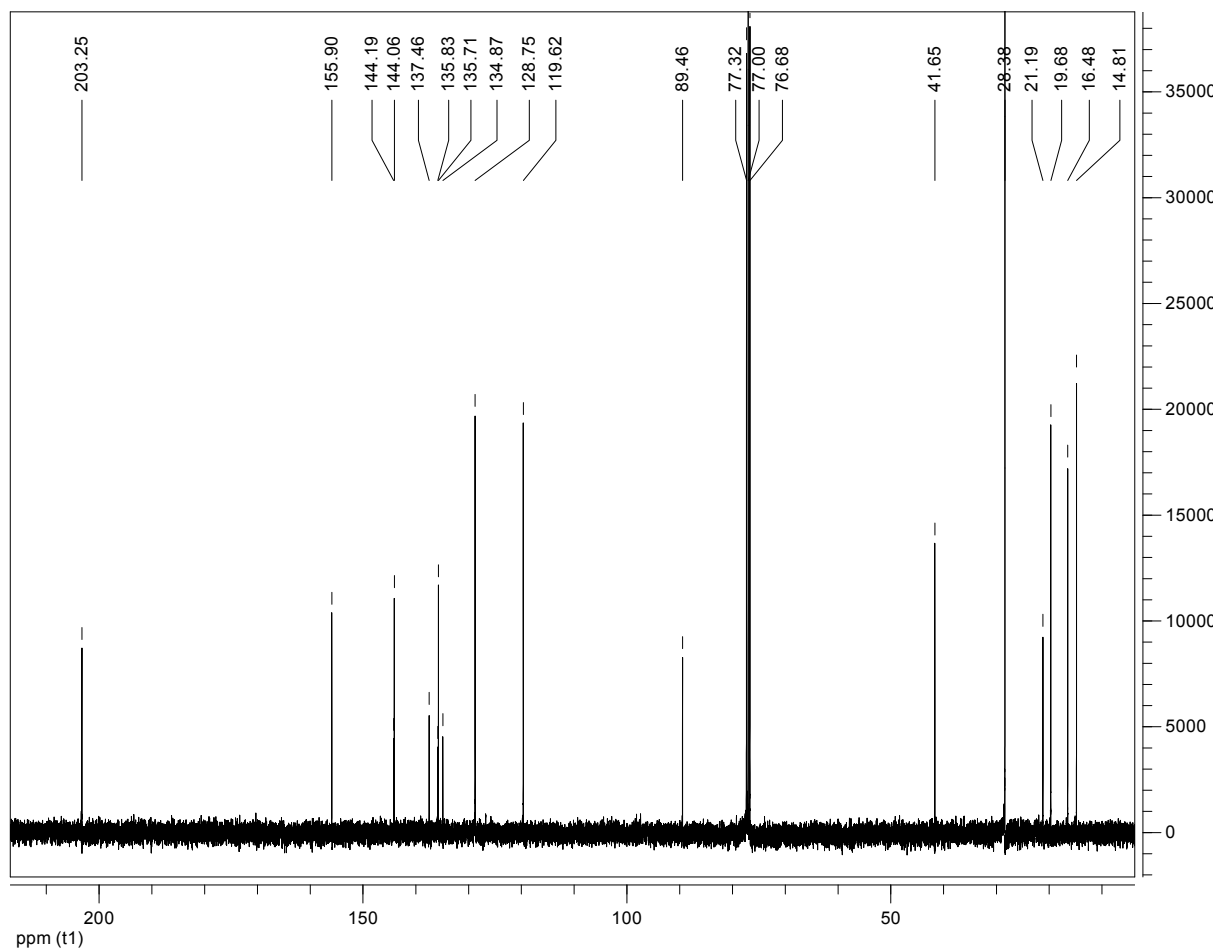

**Figure S8.** <sup>13</sup>C NMR of *zDIP6* in CDCl<sub>3</sub>.

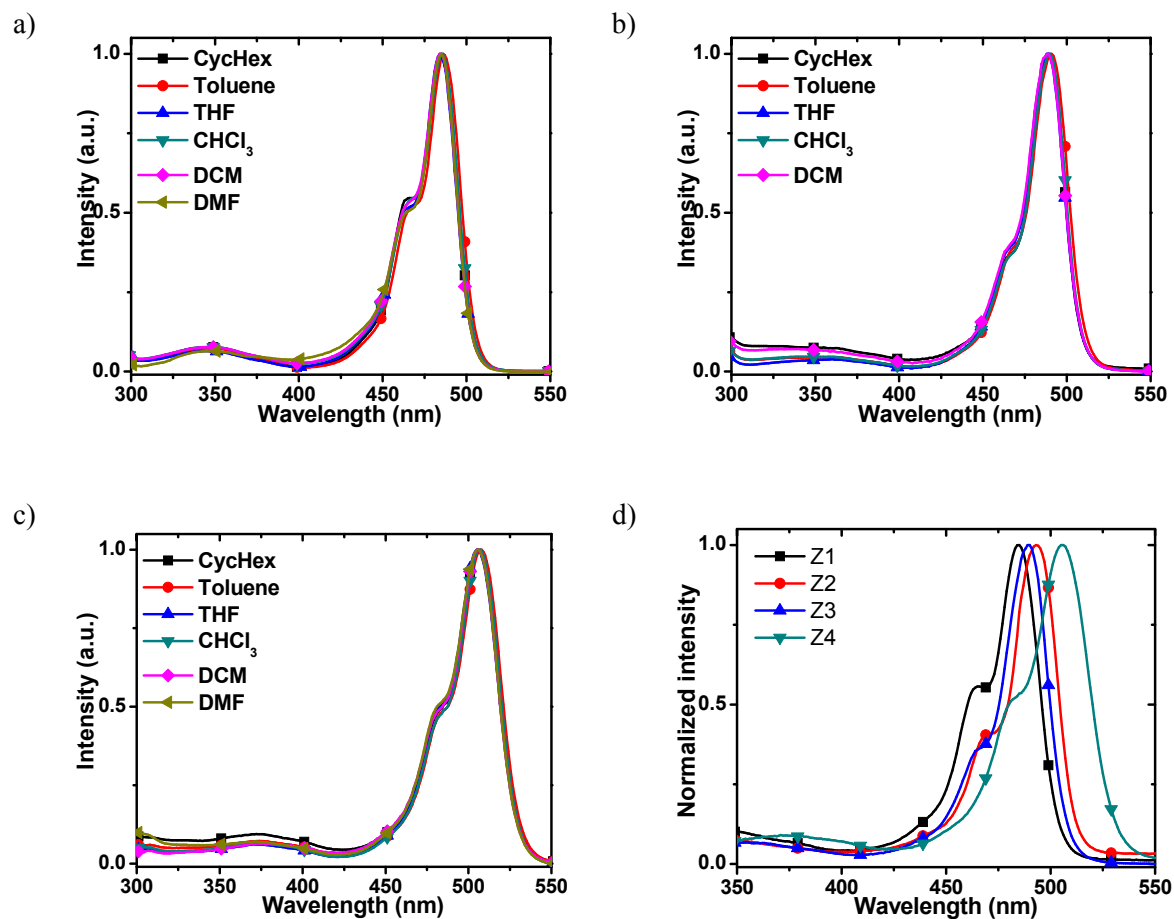

**Figure S9.** Absorption spectra in different solvents of (a) *zDIP1*, (b) *zDIP3*, (c) *zDIP4*; and (d) absorption spectra of *zDIP1-4* in cyclohexane.

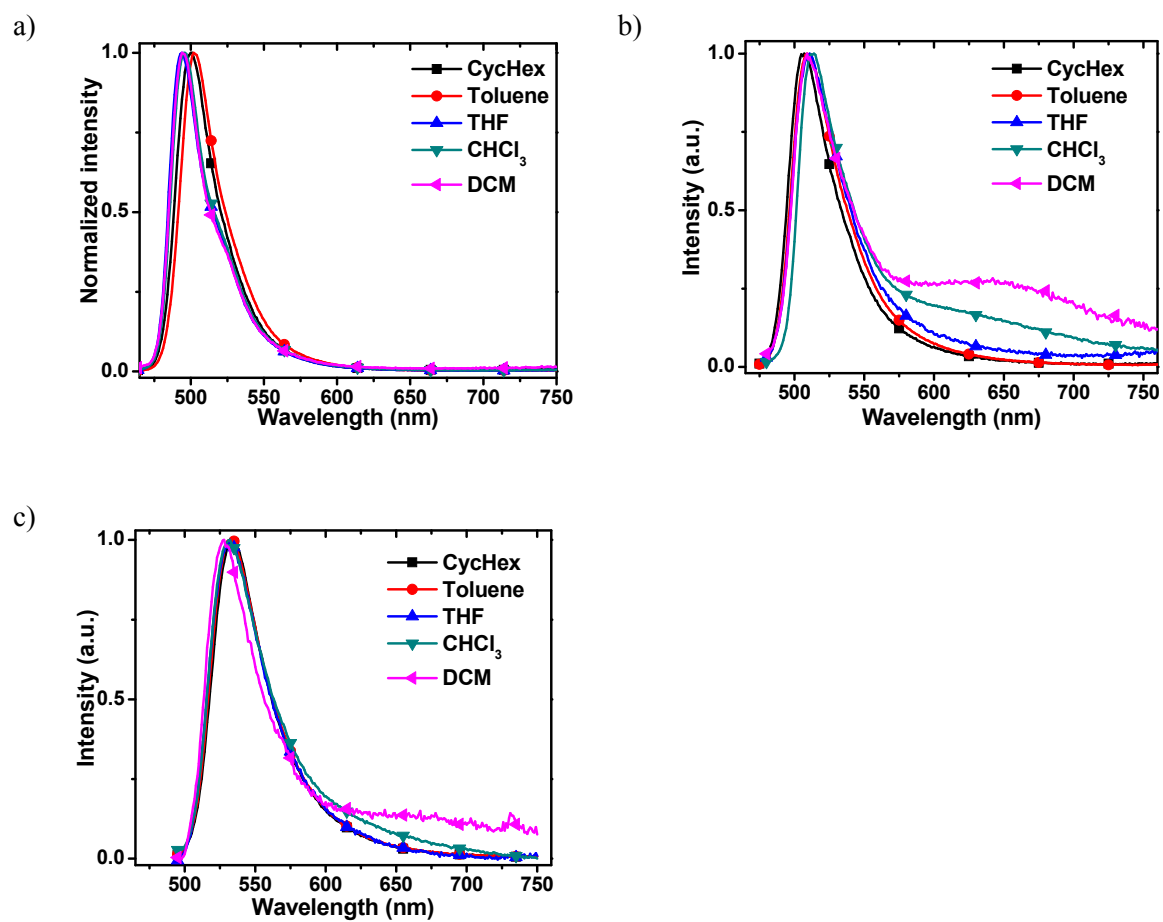

**Figure S10.** Normalized emission spectra in different solvents of (a) *zDIP1*, (b) *zDIP3* and (c) *zDIP4*.

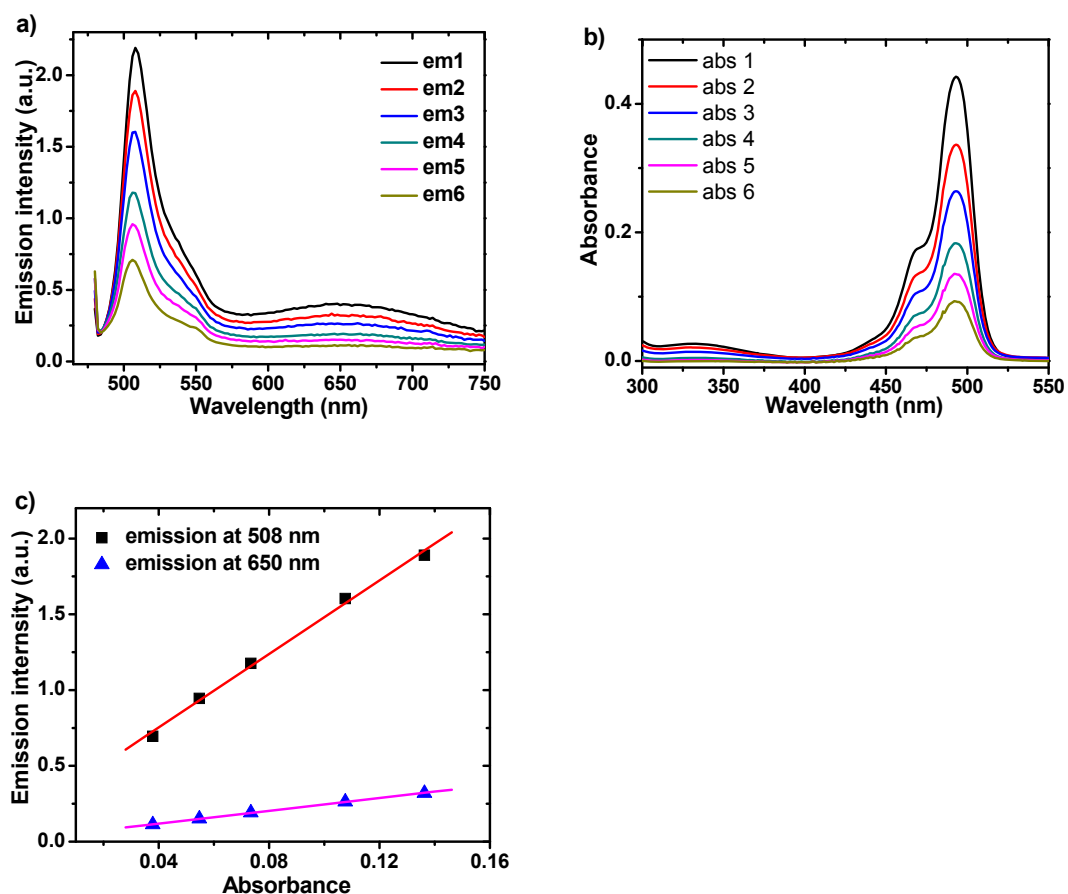

**Figure S11.** Emission and absorption intensities of *zDIP2* solution in dichloromethane at various concentrations. (a) emission spectra and (b) corresponding absorption spectra as concentration decreases; (c) emission intensities are plotted vs. absorption intensity, linear dependence of emission peaks at 508 and 650 nm excludes excimer formation in solution.

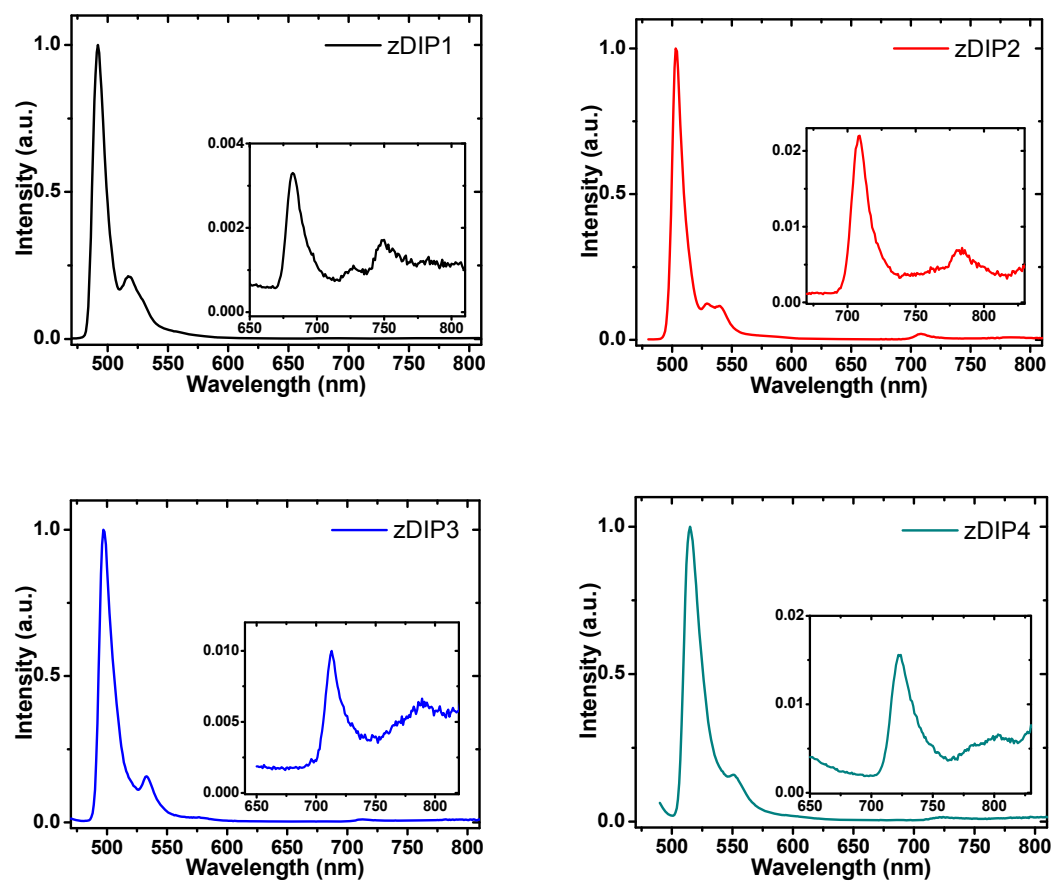

**Figure S12.** Emission spectra of *zDIP1-4* in 2-methyl tetrahydrofuran at 77K.

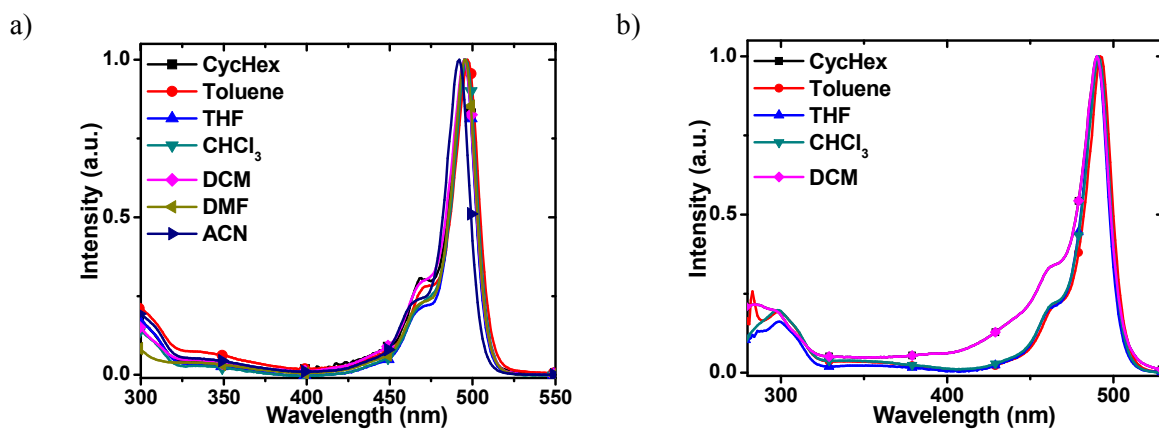

**Figure S13.** Absorption spectra of heteroleptic complexes (a) *zDIP5* and (b) *zDIP6* in different solvents.

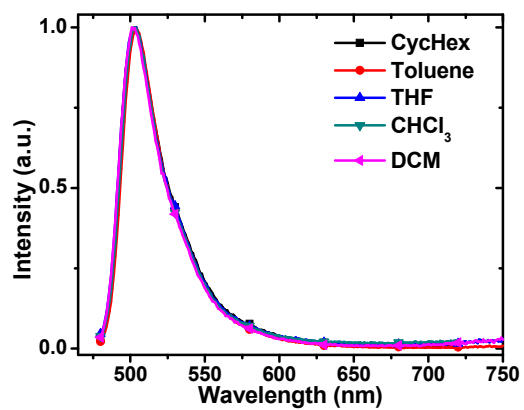

**Figure S14.** Emission spectra of *zDIP6* in different solvents.

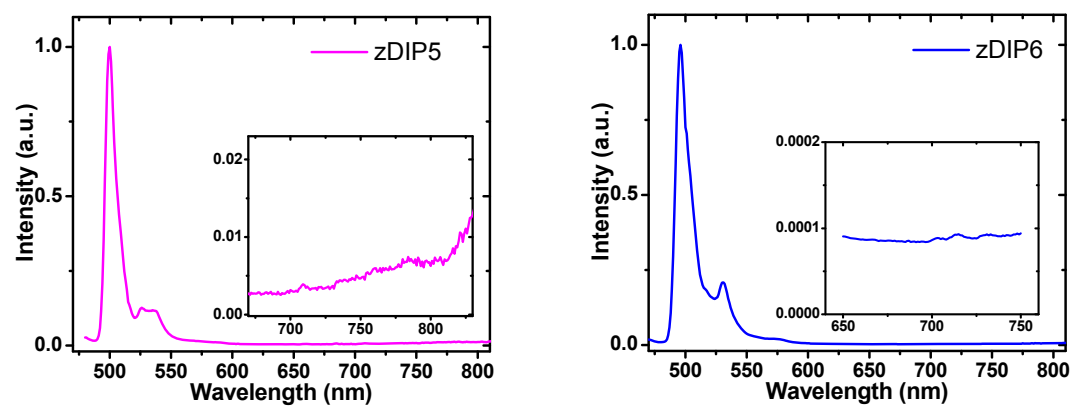

**Figure S15.** Emission spectra of *zDIP5* (left) and *zDIP6* (right) in 2-methyl tetrahydrofuran at 77K.



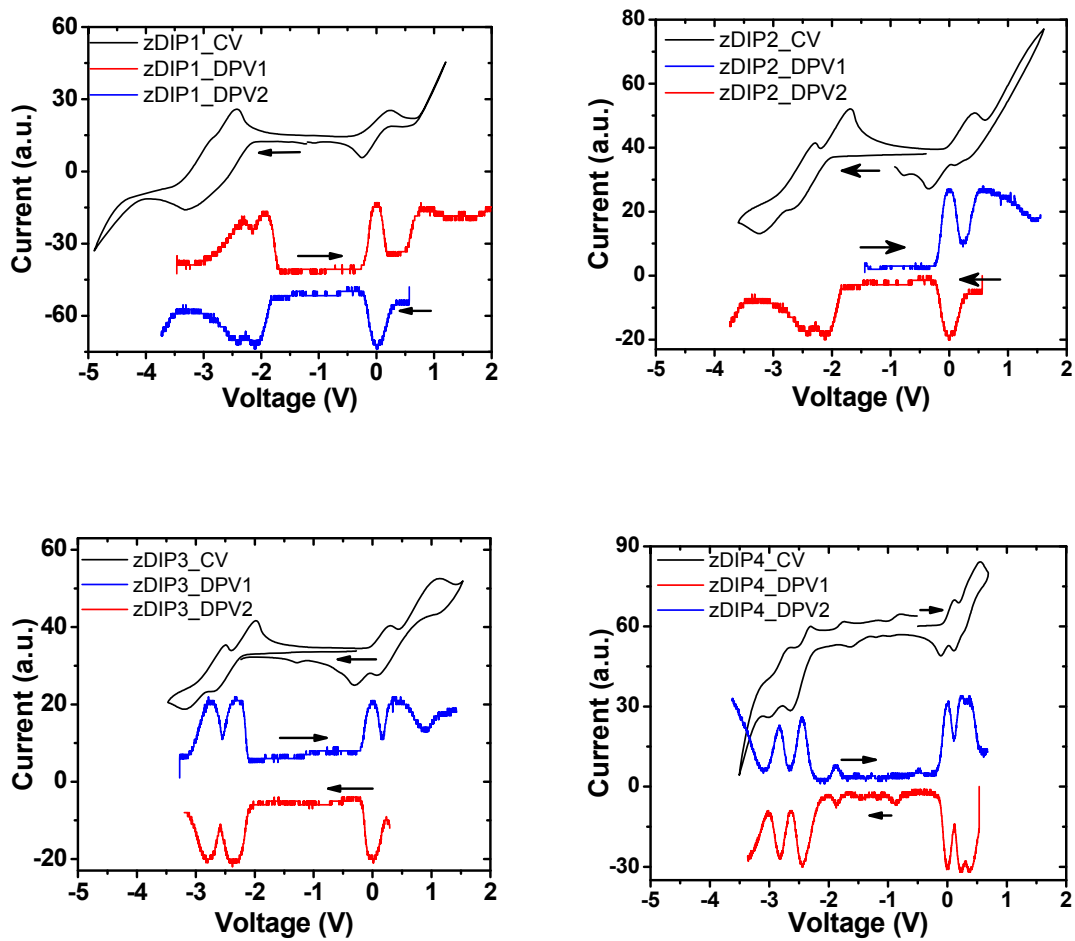

**Figure S16.** Electrochemical measurements of *zDIP1-4* in dry THF under  $N_2$ , scan rate is 100 mV/s.  $Fc^+/Fc$  was used as internal standard.

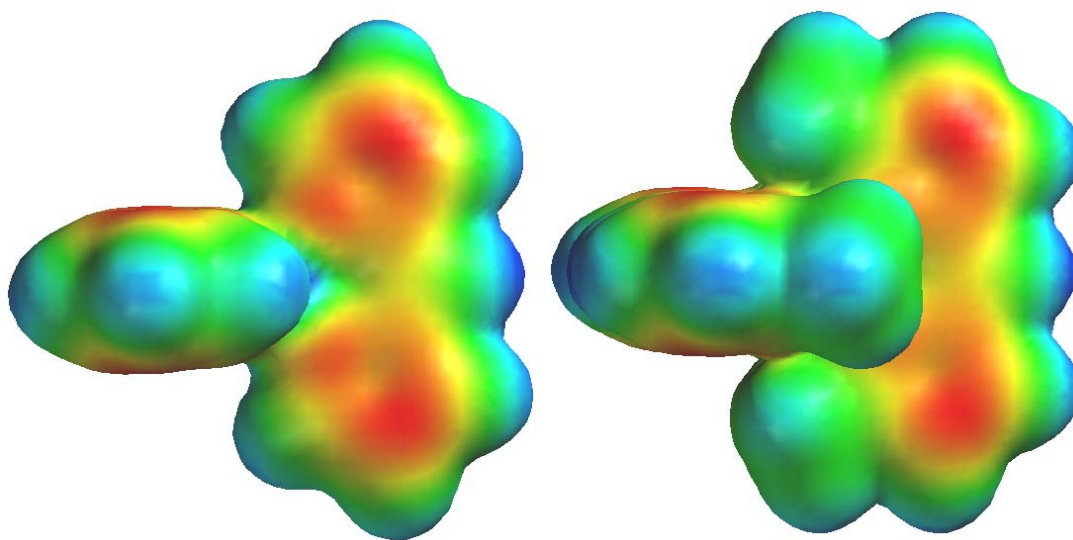

**Figure S17.** Electron density surfaces of *zDIP1* (left) and *zDIP2* (right) with D2d symmetry, performed at B3LYP/LACVP\*\* level of theory. Mesityl group are omitted for simplicity of calculation.

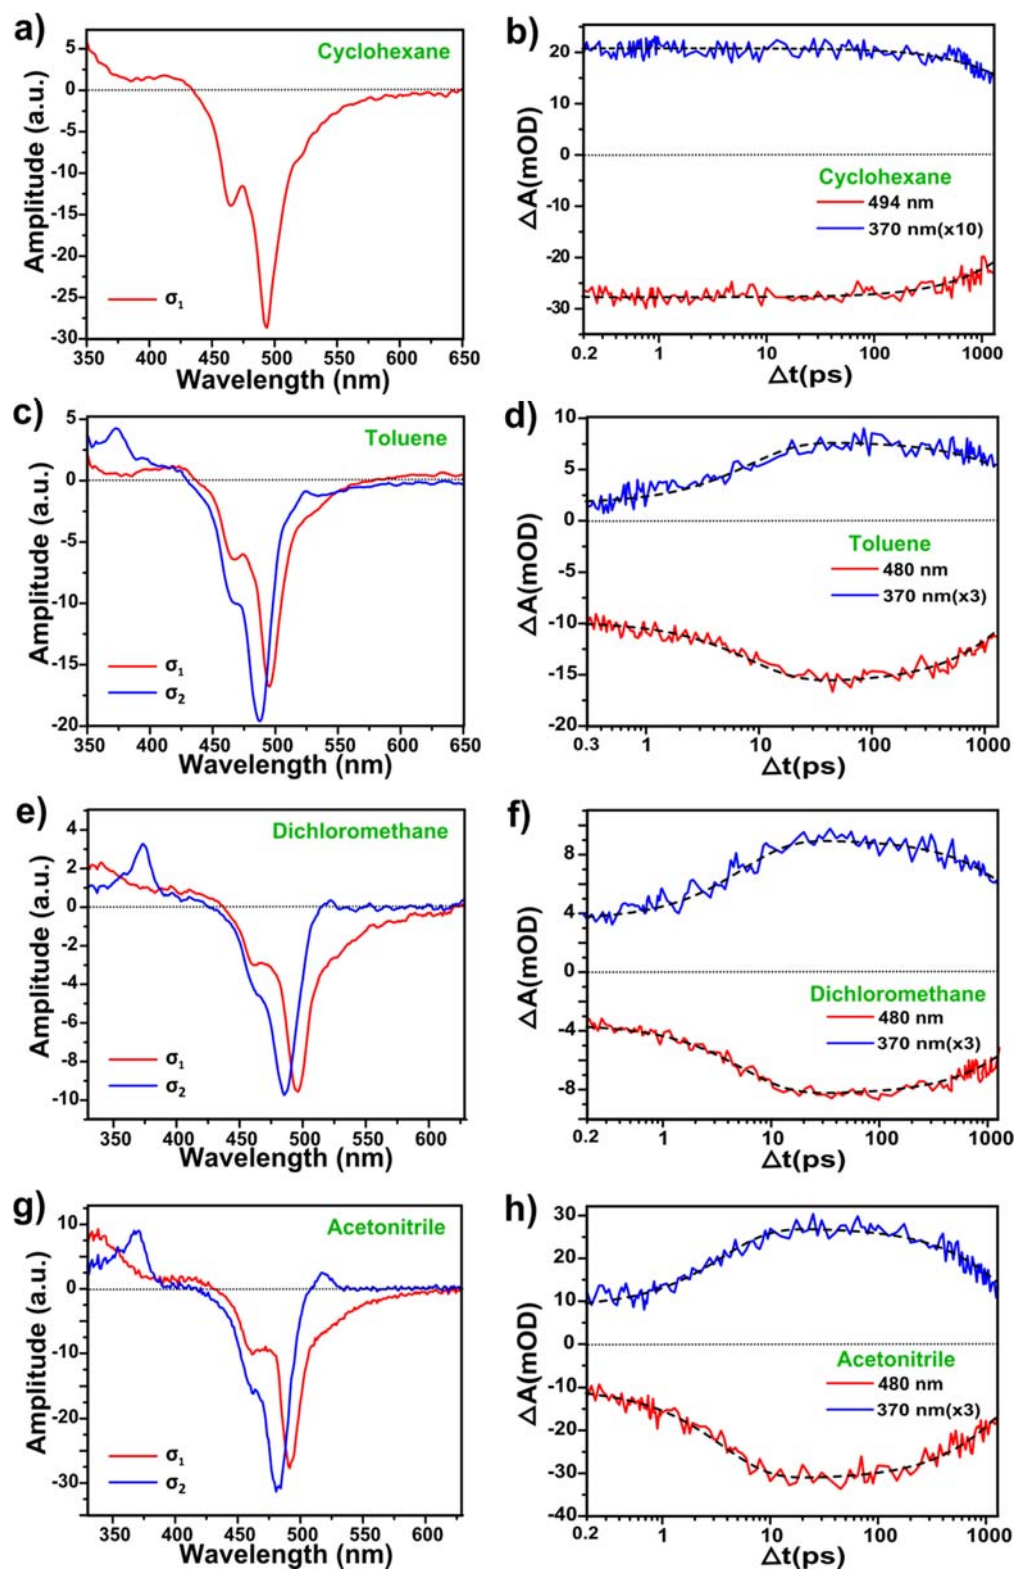

**Figure S18:** (a, c, e, g) SADS used to model the transient spectra of *zDIP1*. (b, d, f, h) The fits (black dashed) based on SADS analysis for the time slices taken through the ground state bleach (red) and spectral range indicative of CT state (blue).

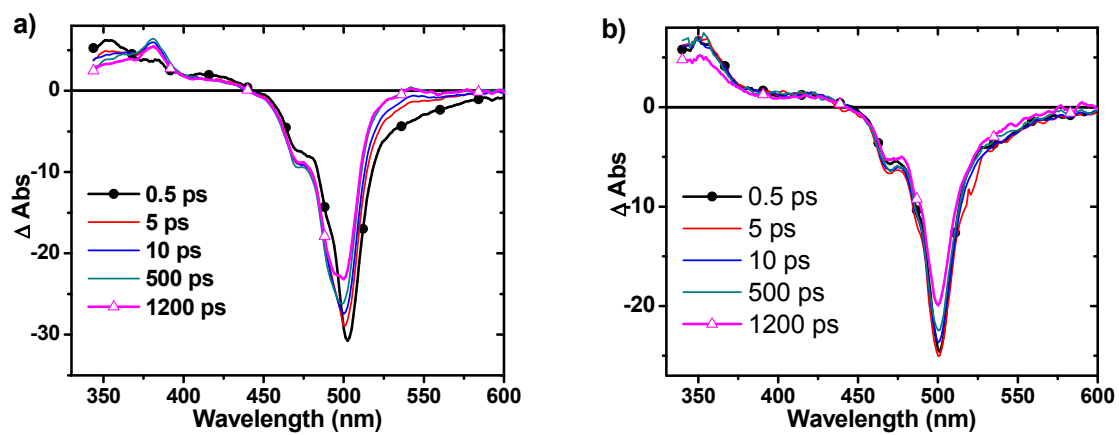

**Figure S19.** Transient absorption spectra of *zDIP2* in (a) toluene and (b) cyclohexane.

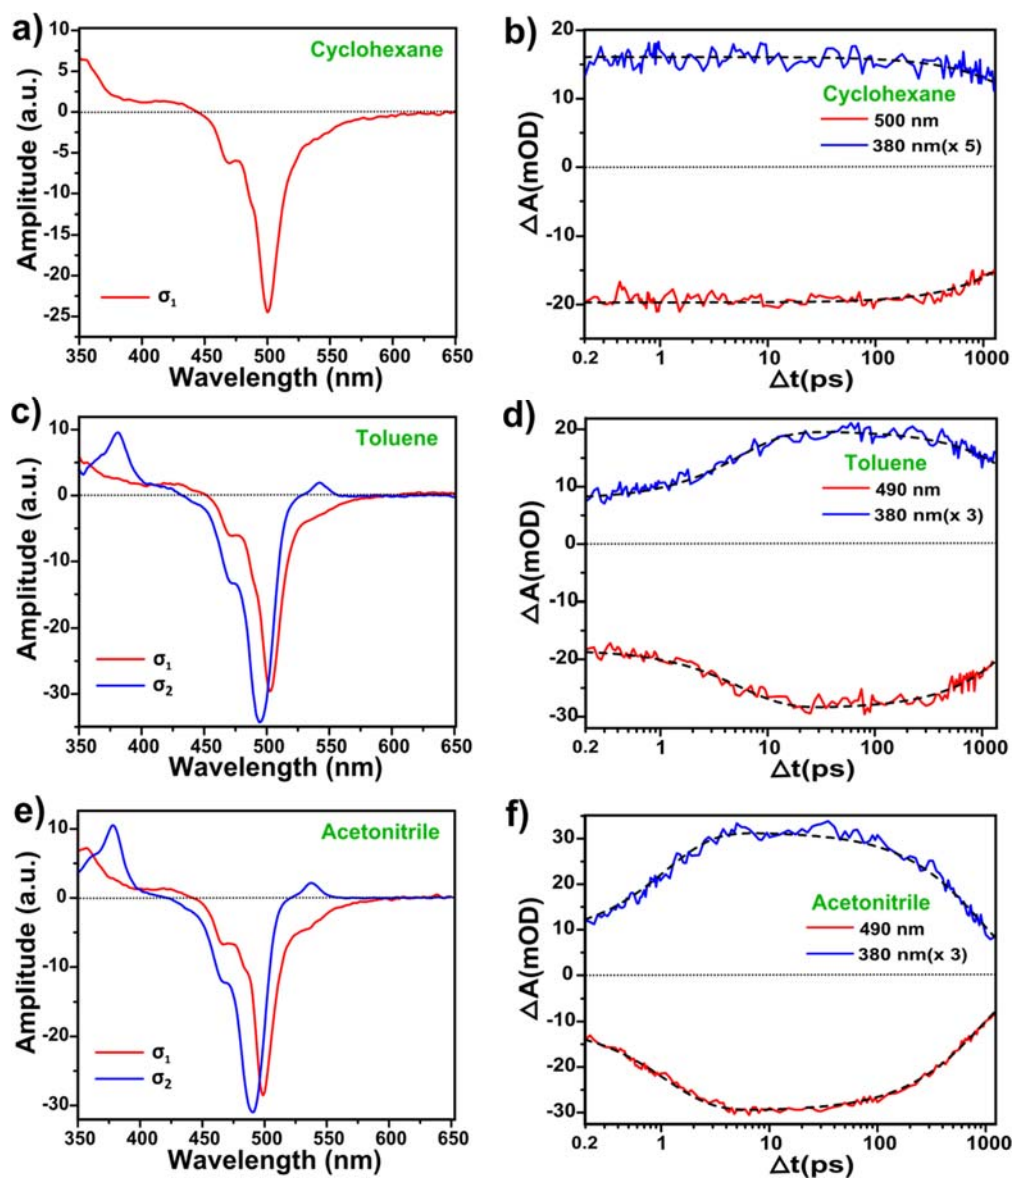

**Figure S20:** (a, c, e) SADS used to model the transient spectra of *zDIP2*. (b, d, f) The fits (black dashed) based on SADS analysis for the time slices taken through the ground state bleach (red) and spectral range indicative of CT state (blue).

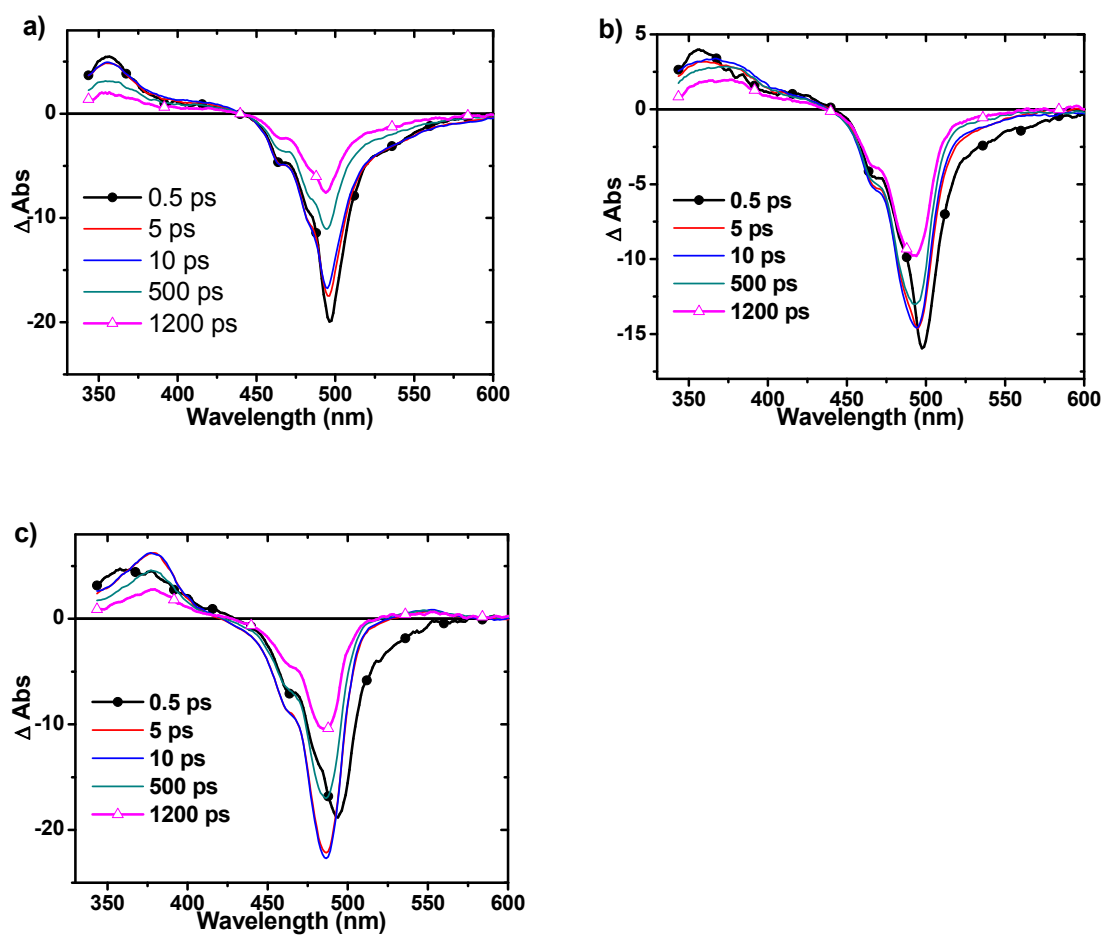

**Figure S21.** Transient absorption spectra of *zDIP3* in (a) Cyclohexane, (b) toluene and (c) acetonitrile.

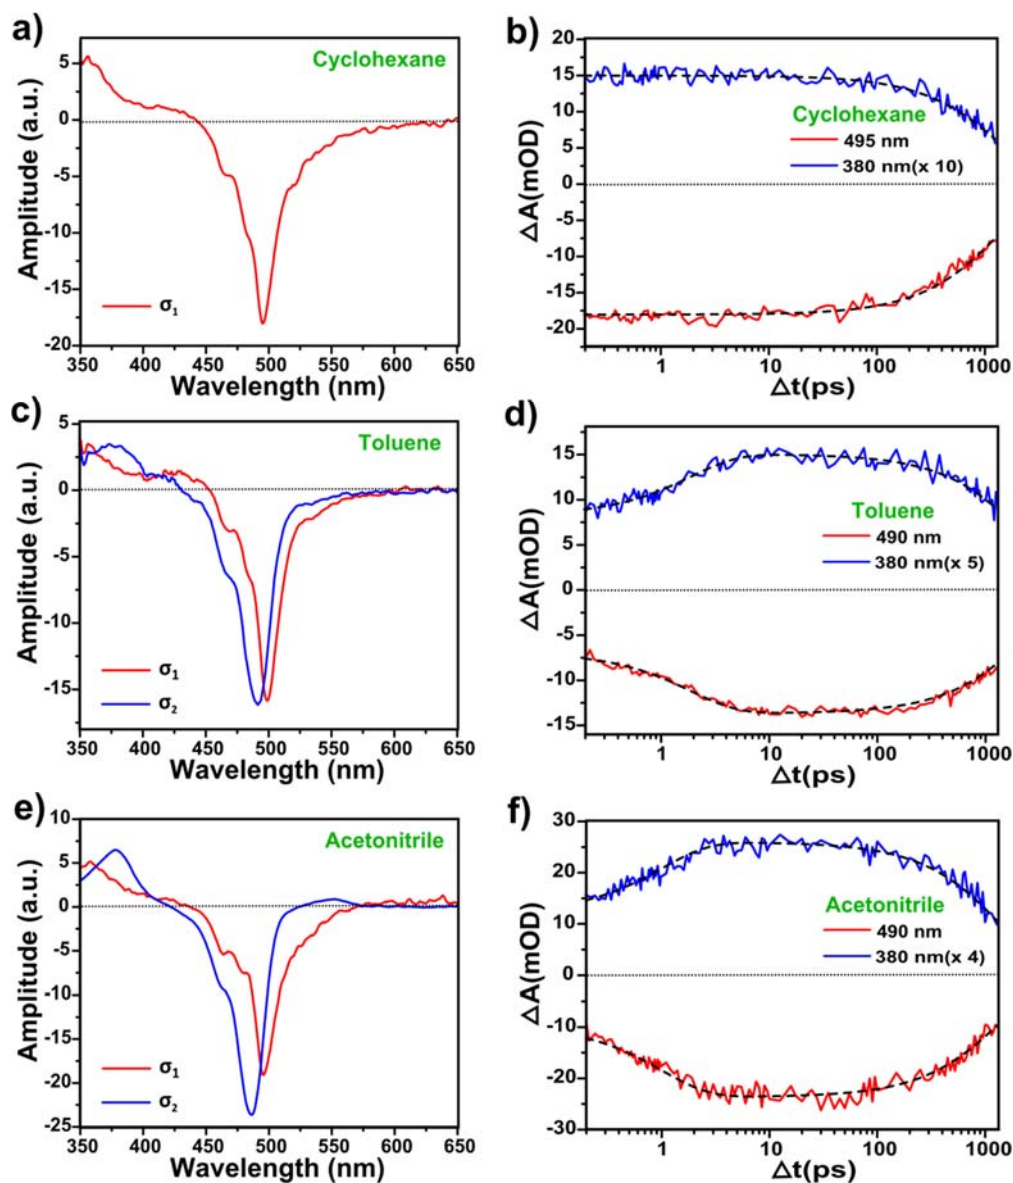

**Figure S22:** (a, c, e) SADS used to model the transient spectra of *zDIP3*. (b, d, f) The fits (black dashed) based on SADS analysis for the time slices taken through the ground state bleach (red) and spectral range indicative of CT state (blue).

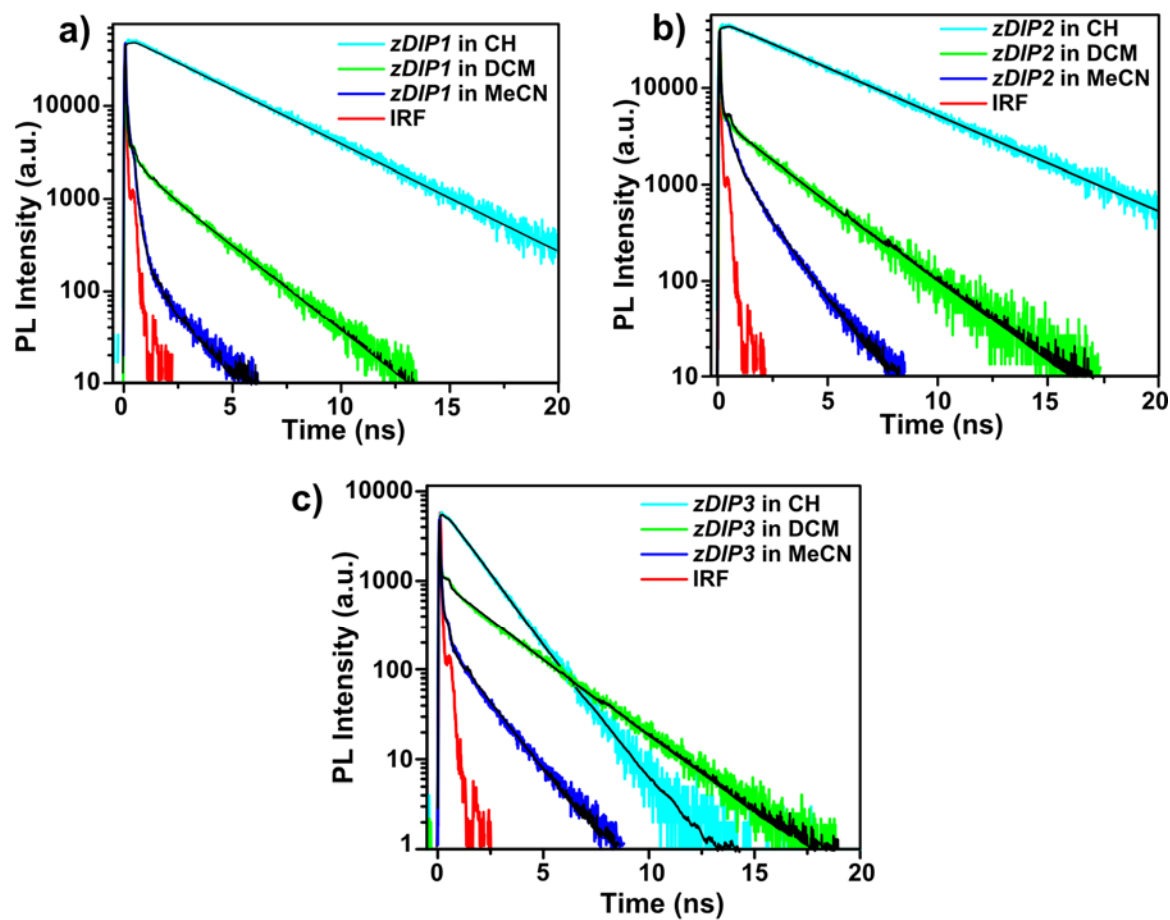

**Figure S23:** Normalized photoluminescence (PL) measurements of a) *zDIP1*, b) *zDIP2* and c) *zDIP3* in various polarity solvents. The emission is collected at 520 nm following excitation with 500 nm. The instrument response function (FWHM  $\sim$  22 ps) is also shown in red. The black lines are the fit to the PL measurements with exponential(s) (amplitudes and time constants are shown in table S14).



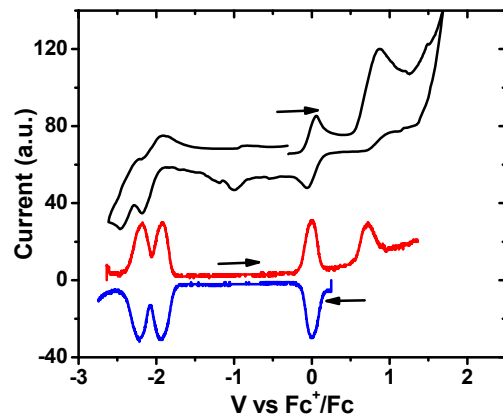

**Figure S24.** Electrochemical measurement of *zDIP1* in DCM, *zDIP1* undergoes irreversible oxidation and two reversible reductions.

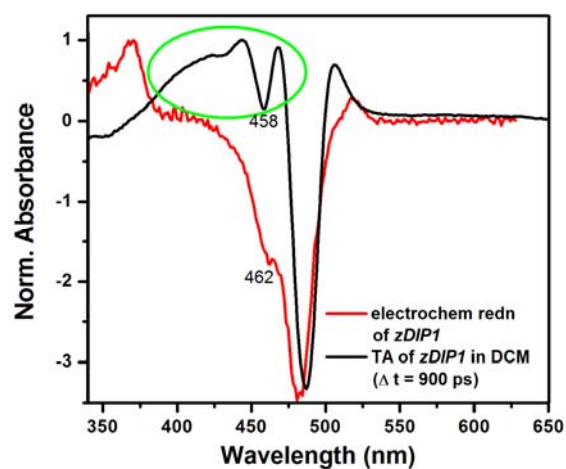

**Figure S25.** Spectral lineshape comparison between spectro-electrochemical reduction and TA experiments on *zDIP1* in DCM. The encircled portion in green shows the peak responsible for the difference.

a)

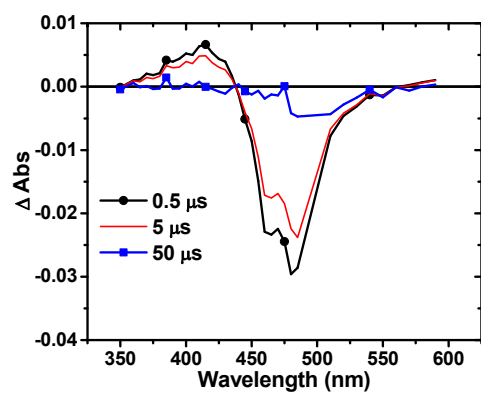

b)

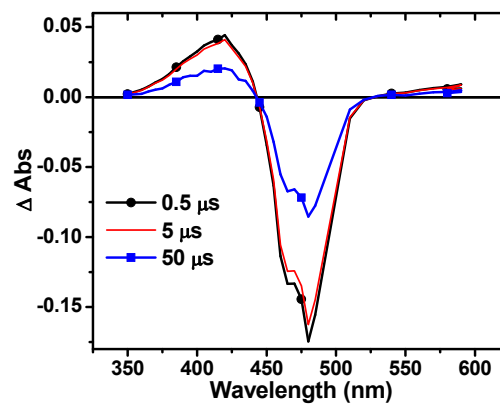

**Figure S25.** Microsecond transient absorption spectra of *zDIP1* (a) in cyclohexane and (b) in toluene

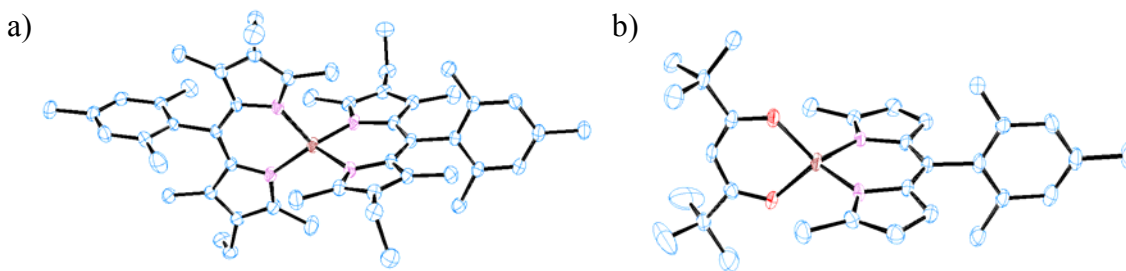

**Figure S26.** ORTEP diagrams of (a) *zDIP4* and (b) *zDIP5* at 50% probability level. H atoms are omitted for clarity.

**Table S1. Photophysical properties of homoleptic and heteroleptic zinc dipyrin complexes in different solvents at room temperature.**

| Solvents            | $\lambda_{\text{abs}}$<br>(max/nm) | fwhm <sub>ab</sub><br>(cm <sup>-1</sup> ) | $\lambda_{\text{em}}$<br>(max/nm) | fwhm <sub>em</sub><br>(cm <sup>-1</sup> ) | $\Delta\nu_{\text{ab-em}}$<br>(cm <sup>-1</sup> ) | QE<br>(%) | $\tau$<br>(ns)                           | k <sub>r</sub><br>(ns <sup>-1</sup> ) | k <sub>nr</sub><br>(ns <sup>-1</sup> ) |
|---------------------|------------------------------------|-------------------------------------------|-----------------------------------|-------------------------------------------|---------------------------------------------------|-----------|------------------------------------------|---------------------------------------|----------------------------------------|
| <i>zDIP1</i> CycHex | 484                                | 1530                                      | 501                               | 1260                                      | 638                                               | 46.5      | 4.3                                      | 0.11                                  | 0.12                                   |
| Toluene             | 486                                | 1443                                      | 503                               | 1256                                      | 659                                               | 33.3      | 3.0                                      | 0.11                                  | 0.22                                   |
| THF                 | 484                                | 1437                                      | 494                               | 1231                                      | 406                                               | 2.7       | 2.6 <sup>(a)</sup>                       | 0.01                                  | 0.37                                   |
| CHCl <sub>3</sub>   | 485                                | 1483                                      | 496                               | 1218                                      | 426                                               | 2.2       | -                                        | -                                     | -                                      |
| DCM                 | 485                                | 1471                                      | 495                               | 1131                                      | 429                                               | 1.7       | 2.1 <sup>(b)</sup>                       | -                                     | -                                      |
| ACN                 | 481                                | 1423                                      | 490                               | 1180                                      | 396                                               | < 0.1     | 1.7 <sup>(b)</sup>                       | -                                     | -                                      |
| <i>zDIP2</i> CycHex | 493                                | 983                                       | 506                               | 944                                       | 501                                               | 66.0      | 4.8                                      | 0.14                                  | 0.07                                   |
| Toluene             | 495                                | 1022                                      | 509                               | 959                                       | 567                                               | 19.0      | 3.9                                      | 0.05                                  | 0.21                                   |
| THF                 | 493                                | 1016                                      | 507                               | 1013                                      | 586                                               | 0.9       | 2.9 <sup>(a)</sup>                       | 0.003                                 | 0.34                                   |
| CHCl <sub>3</sub>   | 494                                | 1083                                      | 509                               | 1013                                      | 592                                               | 0.5       | 2 <sup>(a)</sup>                         | -                                     | -                                      |
| DCM                 | 493                                | 1074                                      | 508 (650)                         | 1108                                      | 706                                               | < 0.1     | 2.5 <sup>(b)</sup> (2.2 <sup>(c)</sup> ) | -                                     | -                                      |
| ACN                 | 490                                | 1056                                      | 508                               | 1494                                      | 736                                               | -         | 1.4 <sup>(b)</sup>                       | -                                     | -                                      |
| <i>zDIP3</i> CycHex | 489                                | 1036                                      | 507                               | 1500                                      | 676                                               | 16.3      | 1.5                                      | 0.11                                  | 0.56                                   |
| Toluene             | 491                                | 1102                                      | 509                               | 1523                                      | 736                                               | 13.8      | 2.1                                      | 0.07                                  | 0.41                                   |
| THF                 | 489                                | 1092                                      | 511                               | 1576                                      | 902                                               | 2.0       | 2.8 <sup>(a)</sup>                       | 0.007                                 | 0.35                                   |
| CHCl <sub>3</sub>   | 490                                | 1057                                      | 513                               | 1494                                      | 915                                               | 0.5       | -                                        | -                                     | -                                      |
| DCM                 | 488                                | 1127                                      | 509 (653)                         | 1591                                      | 819                                               | < 0.1     | 2.4 <sup>(b)</sup> (2.5 <sup>(c)</sup> ) | -                                     | -                                      |
| <i>zDIP4</i> CycHex | 506                                | 1393                                      | 533                               | 1480                                      | 1026                                              | 17.4      | 1.9                                      | 0.09                                  | 0.43                                   |
| Toluene             | 508                                | 1323                                      | 533                               | 1565                                      | 920                                               | 13.4      | 2.4                                      | 0.06                                  | 0.36                                   |

|                     |     |      |           |      |     |       |                    |      |      |
|---------------------|-----|------|-----------|------|-----|-------|--------------------|------|------|
| THF                 | 505 | 1432 | 532       | 1604 | 982 | 2.6   | 2.6 <sup>(a)</sup> | 0.01 | 0.37 |
| CHCl <sub>3</sub>   | 507 | 1296 | 532       | 1632 | 917 | 0.7   | -                  | -    | -    |
| DCM                 | 506 | 1403 | 528 (674) | 1503 | 831 | < 0.1 | -                  | -    | -    |
| <hr/>               |     |      |           |      |     |       |                    |      |      |
| <i>zDIP5</i> CycHex | 495 | 733  | 503       | 863  | 305 | 51.6  | 3.4                | 0.15 | 0.14 |
| Toluene             | 497 | 739  | 506       | 861  | 350 | 48.4  | 2.8                | 0.17 | 0.18 |
| THF                 | 495 | 675  | 504       | 849  | 337 | 41.2  | 2.3                | 0.18 | 0.26 |
| CHCl <sub>3</sub>   | 496 | 714  | 505       | 866  | 343 | 42.2  | 2.2                | 0.19 | 0.26 |
| DCM                 | 495 | 777  | 505       | 885  | 388 | 30.3  | 1.8                | 0.17 | 0.39 |
| DMF                 | 495 | 781  | 505       | 882  | 386 | 26.0  | -(a)               | -    | -    |
| ACN                 | 492 | 713  | 501       | 885  | 367 | 17.3  | -(a)               | -    | -    |
| <hr/>               |     |      |           |      |     |       |                    |      |      |
| <i>zDIP6</i> CycHex | 491 | 757  | 503       | 1311 | 467 | 8.5   | 0.8                | 0.11 | 1.14 |
| Toluene             | 493 | 739  | 504       | 1240 | 463 | 8.5   | 0.8                | 0.11 | 1.14 |
| THF                 | 490 | 723  | 503       | 1290 | 516 | 4.9   | -(a)               | -    | -    |
| CHCl <sub>3</sub>   | 491 | 755  | 503       | 1220 | 485 | 5.0   | -(a)               | -    | -    |
| DCM                 | 490 | 869  | 502       | 1290 | 485 | 3.7   | -(a)               | -    | -    |

<sup>(a)</sup> detected at 520 nm, there is a faster component than instrument resolution (0.4 ns), <sup>(b)</sup> detected at 520 nm, there is a faster component than instrument resolution (22 ps), <sup>(c)</sup> detected at 645 nm.

**Table S2.** X-ray data collection details for *zDIP3*.

| Axis  | dx/mm  | 2 $\theta$ /° | $\omega$ /° | $\phi$ /° | $\chi$ /° | Width/° | Frames | Time/s | Wavelength/ $\text{\AA}$ | Voltage/kV | Current/mA | Temperature/K |
|-------|--------|---------------|-------------|-----------|-----------|---------|--------|--------|--------------------------|------------|------------|---------------|
| Omega | 50.301 | 30.00         | 30.00       | 0.00      | 54.73     | 0.50    | 360    | 10.00  | 0.71073                  | 50         | 30.0       | 100.00        |
| Omega | 50.301 | 30.00         | 30.00       | 72.00     | 54.73     | 0.50    | 360    | 10.00  | 0.71073                  | 50         | 30.0       | 100.00        |
| Omega | 50.301 | 30.00         | 30.00       | 144.00    | 54.73     | 0.50    | 360    | 10.00  | 0.71073                  | 50         | 30.0       | 100.00        |
| Omega | 50.301 | 30.00         | 30.00       | 216.00    | 54.73     | 0.50    | 360    | 10.00  | 0.71073                  | 50         | 30.0       | 100.00        |
| Omega | 50.301 | 30.00         | 30.00       | 288.00    | 54.73     | 0.50    | 360    | 10.00  | 0.71073                  | 50         | 30.0       | 100.00        |
| Phi   | 50.301 | 30.00         | 0.00        | 0.00      | 54.73     | 0.50    | 720    | 10.00  | 0.71073                  | 50         | 30.0       | 100.00        |

**Table S3.** Sample and crystal data for *zDIP3*.

|                               |                                                   |                              |
|-------------------------------|---------------------------------------------------|------------------------------|
| <b>Identification code</b>    | <i>zDIP3</i>                                      |                              |
| <b>Chemical formula</b>       | C <sub>44</sub> H <sub>50</sub> N <sub>4</sub> Zn |                              |
| <b>Formula weight</b>         | 700.25                                            |                              |
| <b>Temperature</b>            | 100(2) K                                          |                              |
| <b>Wavelength</b>             | 0.71073 Å                                         |                              |
| <b>Crystal size</b>           | 0.180 x 0.220 x 0.370 mm                          |                              |
| <b>Crystal habit</b>          | clear light pink prism                            |                              |
| <b>Crystal system</b>         | orthorhombic                                      |                              |
| <b>Space group</b>            | P b c a                                           |                              |
| <b>Unit cell dimensions</b>   | a = 15.2910(14) Å                                 | $\alpha = 90^\circ$          |
| <b>b = 15.0222(14) Å</b>      | $\beta = 90^\circ$                                | $\beta = 101.4330(10)^\circ$ |
| <b>c = 32.525(3) Å</b>        | $\gamma = 90^\circ$                               | $\gamma = 90^\circ$          |
| <b>Volume</b>                 | 7471.1(12) Å <sup>3</sup>                         |                              |
| <b>Z</b>                      | 8                                                 |                              |
| <b>Density (calculated)</b>   | 1.245 g/cm <sup>3</sup>                           |                              |
| <b>Absorption coefficient</b> | 0.693 mm <sup>-1</sup>                            |                              |
| <b>F(000)</b>                 | 2976                                              |                              |



**Table S4.** Data collection and structure refinement for *zDIP3*.

|                                            |                                                                  |                           |
|--------------------------------------------|------------------------------------------------------------------|---------------------------|
| <b>Diffractometer</b>                      | Bruker APEX II CCD                                               |                           |
| <b>Radiation source</b>                    | fine-focus tube, MoK $\alpha$                                    |                           |
| <b>Theta range for data collection</b>     | 1.25 to 26.37°                                                   |                           |
| <b>Index ranges</b>                        | -19 $\leq h \leq$ 19, -18 $\leq k \leq$ 18, -40 $\leq l \leq$ 40 |                           |
| <b>Reflections collected</b>               | 135932                                                           |                           |
| <b>Independent reflections</b>             | 7645 [R(int) = 0.0703]                                           |                           |
| <b>Coverage of independent reflections</b> | 100.0%                                                           |                           |
| <b>Absorption correction</b>               | multi-scan                                                       |                           |
| <b>Max. and min. transmission</b>          | 0.8842 and 0.7854                                                |                           |
| <b>Structure solution technique</b>        | direct methods                                                   |                           |
| <b>Structure solution program</b>          | SHELXS-97 (Sheldrick, 2008)                                      |                           |
| <b>Refinement method</b>                   | Full-matrix least-squares on F <sup>2</sup>                      |                           |
| <b>Refinement program</b>                  | SHELXL-97 (Sheldrick, 2008)                                      |                           |
| <b>Function minimized</b>                  | $\Sigma w(F_o^2 - F_c^2)^2$                                      |                           |
| <b>Data / restraints / parameters</b>      | 7645 / 0 / 456                                                   |                           |
| <b>Goodness-of-fit on F<sup>2</sup></b>    | 1.065                                                            |                           |
| <b><math>\Delta/\sigma_{\max}</math></b>   | 0.001                                                            |                           |
| <b>Final R indices</b>                     | 6085 data; I>2 $\sigma$ (I)                                      | R1 = 0.0368, wR2 = 0.0851 |
|                                            | all data                                                         | R1 = 0.0546, wR2 = 0.0950 |
| <b>Weighting scheme</b>                    | $w=1/[\sigma^2(F_o^2)+(0.0360P)^2+7.7287P]$                      |                           |
|                                            | where $P=(F_o^2+2F_c^2)/3$                                       |                           |
| <b>Largest diff. peak and hole</b>         | 0.362 and -0.419 eÅ <sup>-3</sup>                                |                           |
| <b>R.M.S. deviation from mean</b>          | 0.056 eÅ <sup>-3</sup>                                           |                           |

**Table S5.** X-ray data collection details for *zDIP4*.

| Axis  | dx/mm  | 2 $\theta$ /° | $\omega$ /° | $\phi$ /° | $\chi$ /° | Width/° | Frames | Time/s | Wavelength/Å | Voltage/kV | Current/mA | Temperature/K |
|-------|--------|---------------|-------------|-----------|-----------|---------|--------|--------|--------------|------------|------------|---------------|
| Omega | 50.412 | 30.00         | 30.00       | 0.00      | 54.73     | 0.50    | 360    | 10.00  | 0.71073      | 50         | 30.0       | 99.99         |
| Omega | 50.412 | 30.00         | 30.00       | 72.00     | 54.73     | 0.50    | 360    | 10.00  | 0.71073      | 50         | 30.0       | 100.01        |
| Omega | 50.412 | 30.00         | 30.00       | 144.00    | 54.73     | 0.50    | 360    | 10.00  | 0.71073      | 50         | 30.0       | 100.01        |
| Omega | 50.412 | 30.00         | 30.00       | 216.00    | 54.73     | 0.50    | 360    | 10.00  | 0.71073      | 50         | 30.0       | 100.01        |
| Omega | 50.412 | 30.00         | 30.00       | 288.00    | 54.73     | 0.50    | 360    | 10.00  | 0.71073      | 50         | 30.0       | 100.01        |
| Phi   | 50.412 | 30.00         | 0.00        | 0.00      | 54.73     | 0.50    | 720    | 10.00  | 0.71073      | 50         | 30.0       | 100.01        |

**Table S6.** Sample and crystal data for *zDIP4*.

|                               |                                                 |                             |  |
|-------------------------------|-------------------------------------------------|-----------------------------|--|
| <b>Identification code</b>    | <i>zDIP4</i>                                    |                             |  |
| <b>Chemical formula</b>       | $\text{C}_{52}\text{H}_{66}\text{N}_4\text{Zn}$ |                             |  |
| <b>Formula weight</b>         | 812.46                                          |                             |  |
| <b>Temperature</b>            | 100(2) K                                        |                             |  |
| <b>Wavelength</b>             | 0.71073 Å                                       |                             |  |
| <b>Crystal size</b>           | 0.19 x 0.28 x 0.31 mm                           |                             |  |
| <b>Crystal habit</b>          | clear orange Prism                              |                             |  |
| <b>Crystal system</b>         | monoclinic                                      |                             |  |
| <b>Space group</b>            | P 1 21/n 1                                      |                             |  |
| <b>Unit cell dimensions</b>   | $a = 14.1571(8) \text{ Å}$                      | $\alpha = 90^\circ$         |  |
|                               | $b = 12.7265(7) \text{ Å}$                      | $\beta = 90.3010(10)^\circ$ |  |
|                               | $c = 25.3289(14) \text{ Å}$                     | $\gamma = 90^\circ$         |  |
| <b>Volume</b>                 | $4563.5(4) \text{ Å}^3$                         |                             |  |
| <b>Z</b>                      | 4                                               |                             |  |
| <b>Density (calculated)</b>   | $1.183 \text{ Mg/cm}^3$                         |                             |  |
| <b>Absorption coefficient</b> | $0.577 \text{ mm}^{-1}$                         |                             |  |
| <b>F(000)</b>                 | 1744                                            |                             |  |

**Table S7.** Data collection and structure refinement for *zDIP4*.

|                                            |                                                                  |                           |
|--------------------------------------------|------------------------------------------------------------------|---------------------------|
| <b>Diffractometer</b>                      | Bruker APEX II CCD                                               |                           |
| <b>Radiation source</b>                    | fine-focus tube, MoK $\alpha$                                    |                           |
| <b>Theta range for data collection</b>     | 1.61 to 30.57°                                                   |                           |
| <b>Index ranges</b>                        | -20 $\leq h \leq$ 20, -18 $\leq k \leq$ 18, -36 $\leq l \leq$ 35 |                           |
| <b>Reflections collected</b>               | 107913                                                           |                           |
| <b>Independent reflections</b>             | 13814 [R(int) = 0.0458]                                          |                           |
| <b>Coverage of independent reflections</b> | 98.6%                                                            |                           |
| <b>Absorption correction</b>               | multi-scan                                                       |                           |
| <b>Max. and min. transmission</b>          | 0.8988 and 0.8411                                                |                           |
| <b>Structure solution technique</b>        | direct methods                                                   |                           |
| <b>Structure solution program</b>          | SHELXS-97 (Sheldrick, 2008)                                      |                           |
| <b>Refinement method</b>                   | Full-matrix least-squares on F <sup>2</sup>                      |                           |
| <b>Refinement program</b>                  | SHELXL-97 (Sheldrick, 2008)                                      |                           |
| <b>Function minimized</b>                  | $\Sigma w(F_o^2 - F_c^2)^2$                                      |                           |
| <b>Data / restraints / parameters</b>      | 13814 / 0 / 532                                                  |                           |
| <b>Goodness-of-fit on F<sup>2</sup></b>    | 1.024                                                            |                           |
| <b><math>\Delta/\sigma_{\max}</math></b>   | 0.002                                                            |                           |
| <b>Final R indices</b>                     | 10455 data; I>2 $\sigma$ (I)                                     | R1 = 0.0408, wR2 = 0.1011 |
|                                            | all data                                                         | R1 = 0.0631, wR2 = 0.1122 |
| <b>Weighting scheme</b>                    | $w=1/[\sigma^2(F_o^2)+(0.0542P)^2+2.1872P]$                      |                           |
|                                            | where $P=(F_o^2+2F_c^2)/3$                                       |                           |
| <b>Largest diff. peak and hole</b>         | 0.528 and -0.337 eÅ <sup>-3</sup>                                |                           |
| <b>R.M.S. deviation from mean</b>          | 0.059 eÅ <sup>-3</sup>                                           |                           |

**Table S8.** X-ray data collection details for *zDIP5*.

| Axis  | dx/mm  | 2 $\theta$ /° | $\omega$ /° | $\phi$ /° | $\chi$ /° | Width/° | Frames | Time/s | Wavelength/Å | Voltage/kV | Current/mA | Temperature/K |
|-------|--------|---------------|-------------|-----------|-----------|---------|--------|--------|--------------|------------|------------|---------------|
| Omega | 50.000 | 30.00         | 30.00       | 0.00      | 54.74     | -0.50   | 360    | 30.00  | 0.71073      | 50         | 30.0       | 100.01        |
| Omega | 50.000 | 30.00         | 30.00       | 72.00     | 54.74     | -0.50   | 360    | 30.00  | 0.71073      | 50         | 30.0       | 100.01        |
| Omega | 50.000 | 30.00         | 30.00       | 144.00    | 54.74     | -0.50   | 360    | 30.00  | 0.71073      | 50         | 30.0       | 100.01        |
| Omega | 50.000 | 30.00         | 30.00       | 216.00    | 54.74     | -0.50   | 360    | 30.00  | 0.71073      | 50         | 30.0       | 100.01        |
| Omega | 50.000 | 30.00         | 30.00       | 288.00    | 54.74     | -0.50   | 360    | 30.00  | 0.71073      | 50         | 30.0       | 100.01        |
| Omega | 50.000 | 30.00         | 30.00       | 0.00      | 54.74     | -0.50   | 360    | 30.00  | 0.71073      | 50         | 30.0       | 100.01        |

**Table S9.** Sample and crystal data for *zDIP5*.

|                               |                                                                        |                            |  |
|-------------------------------|------------------------------------------------------------------------|----------------------------|--|
| <b>Identification code</b>    | <i>zDIP5</i>                                                           |                            |  |
| <b>Chemical formula</b>       | $\text{C}_{63}\text{H}_{82}\text{Cl}_2\text{N}_4\text{O}_4\text{Zn}_2$ |                            |  |
| <b>Formula weight</b>         | 1160.97                                                                |                            |  |
| <b>Temperature</b>            | 100(2) K                                                               |                            |  |
| <b>Wavelength</b>             | 0.71073 Å                                                              |                            |  |
| <b>Crystal size</b>           | 0.290 x 0.300 x 0.390 mm                                               |                            |  |
| <b>Crystal system</b>         | triclinic                                                              |                            |  |
| <b>Space group</b>            | P -1                                                                   |                            |  |
| <b>Unit cell dimensions</b>   | a = 13.958(3) Å                                                        | $\alpha = 66.687(2)^\circ$ |  |
|                               | b = 15.459(3) Å                                                        | $\beta = 74.418(2)^\circ$  |  |
|                               | c = 16.517(3) Å                                                        | $\gamma = 78.087(3)^\circ$ |  |
| <b>Volume</b>                 | 3132.5(11) Å <sup>3</sup>                                              |                            |  |
| <b>Z</b>                      | 2                                                                      |                            |  |
| <b>Density (calculated)</b>   | 1.231 g/cm <sup>3</sup>                                                |                            |  |
| <b>Absorption coefficient</b> | 0.898 mm <sup>-1</sup>                                                 |                            |  |
| <b>F(000)</b>                 | 1228                                                                   |                            |  |

**Table S10.** Data collection and structure refinement for *zDIP5*.

|                                          |                                                                                                                                                                                                         |
|------------------------------------------|---------------------------------------------------------------------------------------------------------------------------------------------------------------------------------------------------------|
| <b>Diffractometer</b>                    | Bruker APEX II CCD                                                                                                                                                                                      |
| <b>Radiation source</b>                  | fine-focus tube, MoK $\alpha$                                                                                                                                                                           |
| <b>Theta range for data collection</b>   | 1.52 to 26.00°                                                                                                                                                                                          |
| <b>Index ranges</b>                      | -17 $\leq h \leq 17$ , -19 $\leq k \leq 19$ , -20 $\leq l \leq 20$                                                                                                                                      |
| <b>Reflections collected</b>             | 41573                                                                                                                                                                                                   |
| <b>Independent reflections</b>           | 12284 [R(int) = 0.0510]                                                                                                                                                                                 |
| <b>Absorption correction</b>             | multi-scan                                                                                                                                                                                              |
| <b>Max. and min. transmission</b>        | 0.7821 and 0.7209                                                                                                                                                                                       |
| <b>Structure solution technique</b>      | direct methods                                                                                                                                                                                          |
| <b>Structure solution program</b>        | SHELXS-97 (Sheldrick, 2008)                                                                                                                                                                             |
| <b>Refinement method</b>                 | Full-matrix least-squares on F <sup>2</sup>                                                                                                                                                             |
| <b>Refinement program</b>                | SHELXL-97 (Sheldrick, 2008)                                                                                                                                                                             |
| <b>Function minimized</b>                | $\Sigma w(F_o^2 - F_c^2)^2$                                                                                                                                                                             |
| <b>Data / restraints / parameters</b>    | 12284 / 0 / 699                                                                                                                                                                                         |
| <b>Goodness-of-fit on F<sup>2</sup></b>  | 1.133                                                                                                                                                                                                   |
| <b><math>\Delta/\sigma_{\max}</math></b> | 0.249                                                                                                                                                                                                   |
| <b>Final R indices</b>                   | <div> <div>9284 data; I&gt;2<math>\sigma</math>(I)</div> <div>all data</div> <div> <math>\parallel R1 = 0.0665, wR2 = 0.1458</math><br/> <math>\parallel R1 = 0.0933, wR2 = 0.1717</math> </div> </div> |
| <b>Weighting scheme</b>                  | $w=1/[\sigma^2(F_o^2)+(0.0425P)^2+13.5881P]$<br>where $P=(F_o^2+2F_c^2)/3$                                                                                                                              |
| <b>Extinction coefficient</b>            | 0.0007(3)                                                                                                                                                                                               |
| <b>Largest diff. peak and hole</b>       | 1.294 and -1.037 eÅ <sup>-3</sup>                                                                                                                                                                       |
| <b>R.M.S. deviation from mean</b>        | 0.107 eÅ <sup>-3</sup>                                                                                                                                                                                  |

**Table S11.** X-ray data collection details for *zDIP6*.

| Axis  | dx/mm  | 2 $\theta$ /° | $\omega$ /° | $\phi$ /° | $\chi$ /° | Width/° | Frames | Time/s | Wavelength/Å | Voltage/kV | Current/mA | Temperature/K |
|-------|--------|---------------|-------------|-----------|-----------|---------|--------|--------|--------------|------------|------------|---------------|
| Omega | 50.423 | 30.00         | 30.00       | 0.00      | 54.73     | 0.50    | 360    | 2.00   | 0.71073      | 50         | 30.0       | 99.99         |
| Omega | 50.423 | 30.00         | 30.00       | 72.00     | 54.73     | 0.50    | 360    | 2.00   | 0.71073      | 50         | 30.0       | 99.99         |
| Omega | 50.423 | 30.00         | 30.00       | 144.00    | 54.73     | 0.50    | 360    | 2.00   | 0.71073      | 50         | 30.0       | 99.99         |
| Omega | 50.423 | 30.00         | 30.00       | 216.00    | 54.73     | 0.50    | 360    | 2.00   | 0.71073      | 50         | 30.0       | 99.99         |
| Omega | 50.423 | 30.00         | 30.00       | 288.00    | 54.73     | 0.50    | 360    | 2.00   | 0.71073      | 50         | 30.0       | 99.99         |
| Phi   | 50.423 | 30.00         | 0.00        | 0.00      | 54.73     | 0.50    | 720    | 2.00   | 0.71073      | 50         | 30.0       | 99.99         |



**Table S12.** Sample and crystal data for *zDIP6*.

|                               |                                                           |                                                                            |  |
|-------------------------------|-----------------------------------------------------------|----------------------------------------------------------------------------|--|
| <b>Identification code</b>    | <i>zDIP6</i>                                              |                                                                            |  |
| <b>Chemical formula</b>       | $\text{C}_{33}\text{H}_{44}\text{N}_2\text{O}_2\text{Zn}$ |                                                                            |  |
| <b>Formula weight</b>         | 566.07                                                    |                                                                            |  |
| <b>Temperature</b>            | 100(2) K                                                  |                                                                            |  |
| <b>Wavelength</b>             | 0.71073 Å                                                 |                                                                            |  |
| <b>Crystal size</b>           | 0.170 x 0.270 x 0.350 mm                                  |                                                                            |  |
| <b>Crystal habit</b>          | clear orange Prism                                        |                                                                            |  |
| <b>Crystal system</b>         | monoclinic                                                |                                                                            |  |
| <b>Space group</b>            | C 1 2/c 1                                                 |                                                                            |  |
| <b>Unit cell dimensions</b>   | $a = 13.8580(5) \text{ Å}$                                | $\alpha = 90^\circ$<br>$\beta = 116.7540(10)^\circ$<br>$\gamma = 90^\circ$ |  |
|                               | $b = 17.1278(6) \text{ Å}$                                |                                                                            |  |
|                               | $c = 14.5810(7) \text{ Å}$                                |                                                                            |  |
| <b>Volume</b>                 | $3090.4(2) \text{ Å}^3$                                   |                                                                            |  |
| <b>Z</b>                      | 4                                                         |                                                                            |  |
| <b>Density (calculated)</b>   | $1.217 \text{ Mg/cm}^3$                                   |                                                                            |  |
| <b>Absorption coefficient</b> | $0.825 \text{ mm}^{-1}$                                   |                                                                            |  |
| <b>F(000)</b>                 | 1208                                                      |                                                                            |  |

**Table S13.** Data collection and structure refinement for *zDIP6*.

|                                            |                                                                                                                                                                       |
|--------------------------------------------|-----------------------------------------------------------------------------------------------------------------------------------------------------------------------|
| <b>Diffractometer</b>                      | Bruker APEX II CCD                                                                                                                                                    |
| <b>Radiation source</b>                    | fine-focus tube, MoK $\alpha$                                                                                                                                         |
| <b>Theta range for data collection</b>     | 2.03 to 31.35°                                                                                                                                                        |
| <b>Index ranges</b>                        | -19 ≤ h ≤ 20, -24 ≤ k ≤ 24, -21 ≤ l ≤ 21                                                                                                                              |
| <b>Reflections collected</b>               | 38024                                                                                                                                                                 |
| <b>Independent reflections</b>             | 4848 [R(int) = 0.0443]                                                                                                                                                |
| <b>Coverage of independent reflections</b> | 95.5%                                                                                                                                                                 |
| <b>Absorption correction</b>               | multi-scan                                                                                                                                                            |
| <b>Max. and min. transmission</b>          | 0.8712 and 0.7601                                                                                                                                                     |
| <b>Structure solution technique</b>        | direct methods                                                                                                                                                        |
| <b>Structure solution program</b>          | SHELXS-97 (Sheldrick, 2008)                                                                                                                                           |
| <b>Refinement method</b>                   | Full-matrix least-squares on F <sup>2</sup>                                                                                                                           |
| <b>Refinement program</b>                  | SHELXL-97 (Sheldrick, 2008)                                                                                                                                           |
| <b>Function minimized</b>                  | $\Sigma w(F_o^2 - F_c^2)^2$                                                                                                                                           |
| <b>Data / restraints / parameters</b>      | 4848 / 0 / 182                                                                                                                                                        |
| <b>Goodness-of-fit on F<sup>2</sup></b>    | 1.050                                                                                                                                                                 |
| <b><math>\Delta/\sigma_{\max}</math></b>   | 0.001                                                                                                                                                                 |
| <b>Final R indices</b>                     | 4099 data; I > 2σ(I)        R1 = 0.0318, wR2 = 0.0753<br>all data                            R1 = 0.0437, wR2 = 0.0801                                                |
| <b>Weighting scheme</b>                    | w = 1/[σ <sup>2</sup> (F <sub>o</sub> <sup>2</sup> ) + (0.0379P) <sup>2</sup> + 2.2351P]<br>where P = (F <sub>o</sub> <sup>2</sup> + 2F <sub>c</sub> <sup>2</sup> )/3 |
| <b>Largest diff. peak and hole</b>         | 0.430 and -0.348 eÅ <sup>-3</sup>                                                                                                                                     |
| <b>R.M.S. deviation from mean</b>          | 0.063 eÅ <sup>-3</sup>                                                                                                                                                |

**Table S14:** Fitting parameters for the PL lifetime measurements of *zDIP1-3* in different solutions

|              | <b>Solvents</b> | <b>a<sub>1</sub></b> | <b>τ<sub>1</sub>(ns)</b> | <b>a<sub>2</sub></b> | <b>τ<sub>2</sub>(ps)*</b> |
|--------------|-----------------|----------------------|--------------------------|----------------------|---------------------------|
| <i>zDIP1</i> | Cyclohexane     | 1                    | 3.7 ± 0.2                |                      |                           |
|              | Dichloromethane | 0.227                | 2.2 ± 0.1                | 0.773                | ≤ 22                      |
|              | Acetonitrile    | 0.013                | 1.7 ± 0.05               | 0.987                | ≤22                       |
| <i>zDIP2</i> | Cyclohexane     | 1                    | 4.8 ± 0.3                |                      |                           |
|              | Dichloromethane | 0.181                | 2.5 ± 0.2                | 0.819                | ≤ 22                      |
|              | Acetonitrile    | 0.089                | 1.4 ± 0.02               | 0.910                | ≤ 22                      |
| <i>zDIP3</i> | Cyclohexane     | 1                    | 1.4 ± 0.2                |                      |                           |
|              | Dichloromethane | 0.150                | 2.4 ± 0.1                | 0.850                | ≤ 22                      |
|              | Acetonitrile    | 0.067                | 1.4 ± 0.05               | 0.933                | ≤22                       |

\* The faster component was faster than our instrument response function (FWHM ~22 ps)

## References.

1. *Observation of Triplet Exciton Formation in a Platinum Sensitized Organic Photovoltaic Device*, S. T. Roberts, C. W. Schlenker, V. Barlier, R. E. McAnally, Y. Y. Zhang, J. N. Mastron, M. E. Thompson and S. E. Bradforth, *J. Phys. Chem. Lett.*, **2011**, 2, 48-54.
